# Supplementary material for: Unraveling the marked differences of the phosphorescence efficiencies of blue-emitting iridium complexes with isomerized phenyltriazole ligands
Source: Royal Society of Chemistry journal article supplement (doi:10.1039/c9qi00844f), 2019-01-01
Supplement: c9qi00844f1.pdf [file c9qi00844f1.pdf]

## Supporting Information

### **Unraveling the marked differences of the phosphorescence efficiencies of blue-emitting iridium complexes with isomerized phenyltriazole ligands**

*Chongping Song, Yanan Chen, Jiaqi Li, Fei Zhao and Houyu Zhang\**

State Key Laboratory of Supramolecular Structure and Materials,

Institute of Theoretical Chemistry, College of Chemistry, Jilin University, Changchun 130012, P. R.

China

\*Corresponding author

Email: [houyuzhang@jlu.edu.cn](mailto:hoyuzhang@jlu.edu.cn)

# Contents

**Table S1.** Evaluation of different DFT functionals for **Ir(ptz)<sub>3</sub>** crystal structure.

**Table S2.** Evaluation of different DFT functionals for the calculation of absorption spectra of **Ir(ptz)<sub>3</sub>** in a CH<sub>2</sub>Cl<sub>2</sub> solution.

**Table S3.** Compositions (%) and main contribution assignments of the FMOs in the **S<sub>0</sub>** state for **1-4**.

**Figure S1.** Orbital interaction diagrams for **1-4** at their optimized **S<sub>0</sub>** geometries.

**Table S4:** Calculated absorption properties of **1-4** by TD-DFT.

**Figure S2.** Vibronically-resolved emission spectra by Franck-Condon calculations.

**Figure S3.** Energy-level diagrams of **T<sub>1</sub>** and five **S<sub>n</sub>** states with their dominant excitation in **1-4**.

**Table S5.** Calculated  $k_{nr1}$  of the complexes **2-1** with phenyl substituted **ptz2**.

**Figure S4.** Spin densities of the **<sup>3</sup>MC** states for all investigated complexes.

**Figure S5.** Intrinsic reaction coordinate (IRC) of **<sup>3</sup>TS [T<sub>1</sub>/<sup>3</sup>MC]** for **1-4**.

**Figure S6.** Optimized structures of the **<sup>3</sup>TS [T<sub>1</sub>-<sup>3</sup>MC]** for **1-4**.

**Table S6-S9.** Calculated normal modes with dimensionless displacements, Huang-Rhys factors, and reorganization energies for **1-4**.

**Table S10-S21.** Cartesian coordinates of **1-4** at their **T<sub>1</sub>**, **<sup>3</sup>TS** and **<sup>3</sup>MC** states.

**Table S1.** Selected bond length (Å) at  $S_0$  optimized geometry by using different functionals as well as experimental data for complex *fac*-tris(1-methyl-5-phenyl-3-propyl-1,2,4-triazolyl)iridium(III) (**Ir(ptz)<sub>3</sub>**).

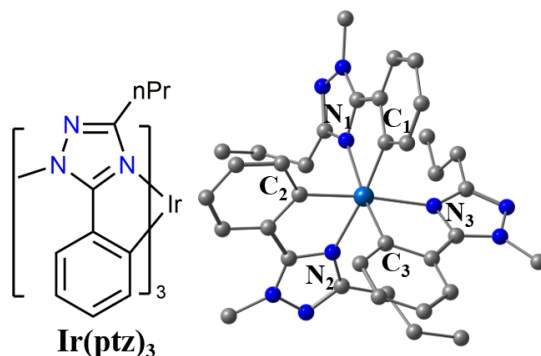

|                   | <b>B3LYP</b> | <b>PBE0</b> | <b>M062X</b> | <b>Cam-B3LYP</b> | <b>EXP</b> |
|-------------------|--------------|-------------|--------------|------------------|------------|
| Ir-N <sub>1</sub> | 2.2200       | 2.1774      | 2.2259       | 2.1941           | 2.1655     |
| Ir-C <sub>1</sub> | 2.0338       | 2.0157      | 2.0067       | 2.0282           | 2.0417     |
| Ir-N <sub>2</sub> | 2.2163       | 2.1736      | 2.2144       | 2.1909           | 2.1352     |
| Ir-C <sub>2</sub> | 2.0315       | 2.0136      | 2.0080       | 2.0267           | 2.0021     |
| Ir-N <sub>3</sub> | 2.2234       | 2.1764      | 2.2160       | 2.1920           | 2.1510     |
| Ir-C <sub>3</sub> | 2.0304       | 2.0130      | 2.0061       | 2.0260           | 2.0217     |
| $\sigma$          | 0.051        | 0.023       | 0.051        | 0.033            |            |

Exp: from ref. 44.

$\sigma$  denotes the standard deviation calculated by the formula  $\sigma = \sqrt{\frac{1}{N} \sum_{i=1}^N (x_i - x_{exp})^2}$

**Table S2.** Calculated absorption wavelengths (nm) by TD-DFT with different functionals in a CH<sub>2</sub>Cl<sub>2</sub> solution in comparison to the available experimental absorption spectra for **Ir(ptz)<sub>3</sub>**.

| <b>Compd</b>               | <b>State</b>         | <b>B3LYP</b> | <b>PBE0</b> | <b>MPW1K</b> | <b>Cam-B3LYP</b> | <b>EXP<sup>a</sup></b> |
|----------------------------|----------------------|--------------|-------------|--------------|------------------|------------------------|
| <b>Ir(ptz)<sub>3</sub></b> | <b>S<sub>1</sub></b> | 371          | 352         | 301          | 305              | 350                    |
|                            | <b>S<sub>n</sub></b> | 256          | 248         | 240          | 241              | 248                    |
|                            | <b>T<sub>1</sub></b> | 413          | 412         | 438          | 403              |                        |
|                            | <b>T<sub>2</sub></b> | 408          | 409         | 437          | 403              |                        |

<sup>a</sup>Exp: from ref. 44.

**Table S3.** Compositions (%) and main contribution assignments of the frontier molecular orbitals in the ground states for **1-4**.

| Comd     | Orbital | Energy (eV) | Ir   | L <sub>1</sub> | L <sub>2</sub> | L <sub>3</sub> | Main assignments                                                              |
|----------|---------|-------------|------|----------------|----------------|----------------|-------------------------------------------------------------------------------|
| <b>1</b> | LUMO+2  | -0.72       | 3.44 | 18.5           | 63.1           | 14.9           | $\pi^* (\text{L}_1) + \pi^* (\text{L}_2) + \pi^* (\text{L}_3)$                |
|          | LUMO+1  | -0.72       | 3.44 | 45.9           | 1.29           | 49.5           | $\pi^* (\text{L}_1) + \pi^* (\text{L}_3)$                                     |
|          | LUMO    | -0.90       | 1.33 | 32.9           | 32.9           | 32.9           | $\pi^* (\text{L}_1) + \pi^* (\text{L}_2) + \pi^* (\text{L}_3)$                |
|          | HOMO    | -5.35       | 54.9 | 15.0           | 15.0           | 15.0           | $d_{z^2}(\text{Ir}) + \pi (\text{L}_1) + \pi (\text{L}_2) + \pi (\text{L}_3)$ |
|          | HOMO-1  | -5.52       | 52.8 | 8.22           | 25.4           | 13.6           | $d_{x^2-y^2}+d_{xy}+d_{yz}(\text{Ir}) + \pi (\text{L}_2) + \pi (\text{L}_3)$  |
|          | HOMO-2  | -5.52       | 52.8 | 23.2           | 6.06           | 17.9           | $d_{x^2-y^2}+d_{xz}+d_{xy}(\text{Ir}) + \pi (\text{L}_1) + \pi (\text{L}_3)$  |
| <b>2</b> | LUMO+2  | -0.28       | 3.47 | 4.29           | 57.0           | 35.2           | $\pi^* (\text{L}_2) + \pi^* (\text{L}_3)$                                     |
|          | LUMO+1  | -0.28       | 3.47 | 60.1           | 7.31           | 29.2           | $\pi^* (\text{L}_1) + \pi^* (\text{L}_3)$                                     |
|          | LUMO    | -0.45       | 1.00 | 32.9           | 32.9           | 32.9           | $\pi^* (\text{L}_1) + \pi^* (\text{L}_2) + \pi^* (\text{L}_3)$                |
|          | HOMO    | -4.91       | 54.3 | 15.2           | 15.2           | 15.2           | $d_{z^2}(\text{Ir}) + \pi (\text{L}_1) + \pi (\text{L}_2) + \pi (\text{L}_3)$ |
|          | HOMO-1  | -5.13       | 52.5 | 9.62           | 23.7           | 14.2           | $d_{x^2-y^2}+d_{xy}+d_{yz} (\text{Ir}) + \pi (\text{L}_2) + \pi$              |
|          | HOMO-2  | -5.13       | 52.5 | 22.1           | 7.99           | 17.5           | $d_{x^2-y^2}+d_{xz}+d_{xy} (\text{Ir}) + \pi (\text{L}_1) + \pi$              |
| <b>3</b> | LUMO+2  | 0.004       | 3.39 | 49.1           | 46.3           | 1.20           | $\pi^* (\text{L}_1) + \pi^* (\text{L}_2)$                                     |
|          | LUMO1   | 0.004       | 3.39 | 15.3           | 18.1           | 63.2           | $\pi^* (\text{L}_1) + \pi^* (\text{L}_2) + \pi^* (\text{L}_3)$                |
|          | LUMO    | -0.14       | 1.76 | 32.7           | 32.7           | 32.7           | $\pi^* (\text{L}_1) + \pi^* (\text{L}_2) + \pi^* (\text{L}_3)$                |
|          | HOMO    | -4.93       | 50.6 | 16.5           | 16.5           | 16.5           | $d_{z^2}(\text{Ir}) + \pi (\text{L}_1) + \pi (\text{L}_2) + \pi (\text{L}_3)$ |
|          | HOMO-1  | -5.06       | 46.2 | 5.96           | 27.1           | 20.8           | $d_{x^2-y^2}+d_{yz} (\text{Ir}) + \pi (\text{L}_2) + \pi (\text{L}_3)$        |
|          | HOMO-2  | -5.06       | 46.2 | 29.9           | 8.78           | 15.1           | $d_{xz}+d_{xy} (\text{Ir}) + \pi (\text{L}_1) + \pi (\text{L}_3)$             |
| <b>4</b> | LUMO+2  | -0.97       | 4.80 | 50.1           | 43.3           | 1.80           | $\pi^* (\text{L}_1) + \pi^* (\text{L}_2)$                                     |
|          | LUMO+1  | -0.97       | 4.80 | 13.4           | 20.1           | 61.7           | $\pi^* (\text{L}_1) + \pi^* (\text{L}_2) + \pi^* (\text{L}_3)$                |
|          | LUMO    | -1.06       | 1.64 | 32.8           | 32.8           | 32.8           | $\pi^* (\text{L}_1) + \pi^* (\text{L}_2) + \pi^* (\text{L}_3)$                |
|          | HOMO    | -5.73       | 46.2 | 17.9           | 17.9           | 17.9           | $d_{z^2}(\text{Ir}) + \pi (\text{L}_1) + \pi (\text{L}_2) + \pi (\text{L}_3)$ |
|          | HOMO-1  | -5.80       | 42.4 | 6.58           | 19.5           | 31.5           | $d_{x^2-y^2}+d_{xz} (\text{Ir}) + \pi (\text{L}_2) + \pi (\text{L}_3)$        |
|          | HOMO-2  | -5.80       | 42.4 | 31.8           | 18.9           | 6.90           | $d_{yz}+d_{xy} (\text{Ir}) + \pi (\text{L}_1) + \pi (\text{L}_2)$             |

L<sub>1</sub>, L<sub>2</sub> and L<sub>3</sub> denote phenyltriazole ligands.

**Figure S1.** Orbital interaction diagrams for **1-4**, formed by four fragments at their optimized **So** geometries.

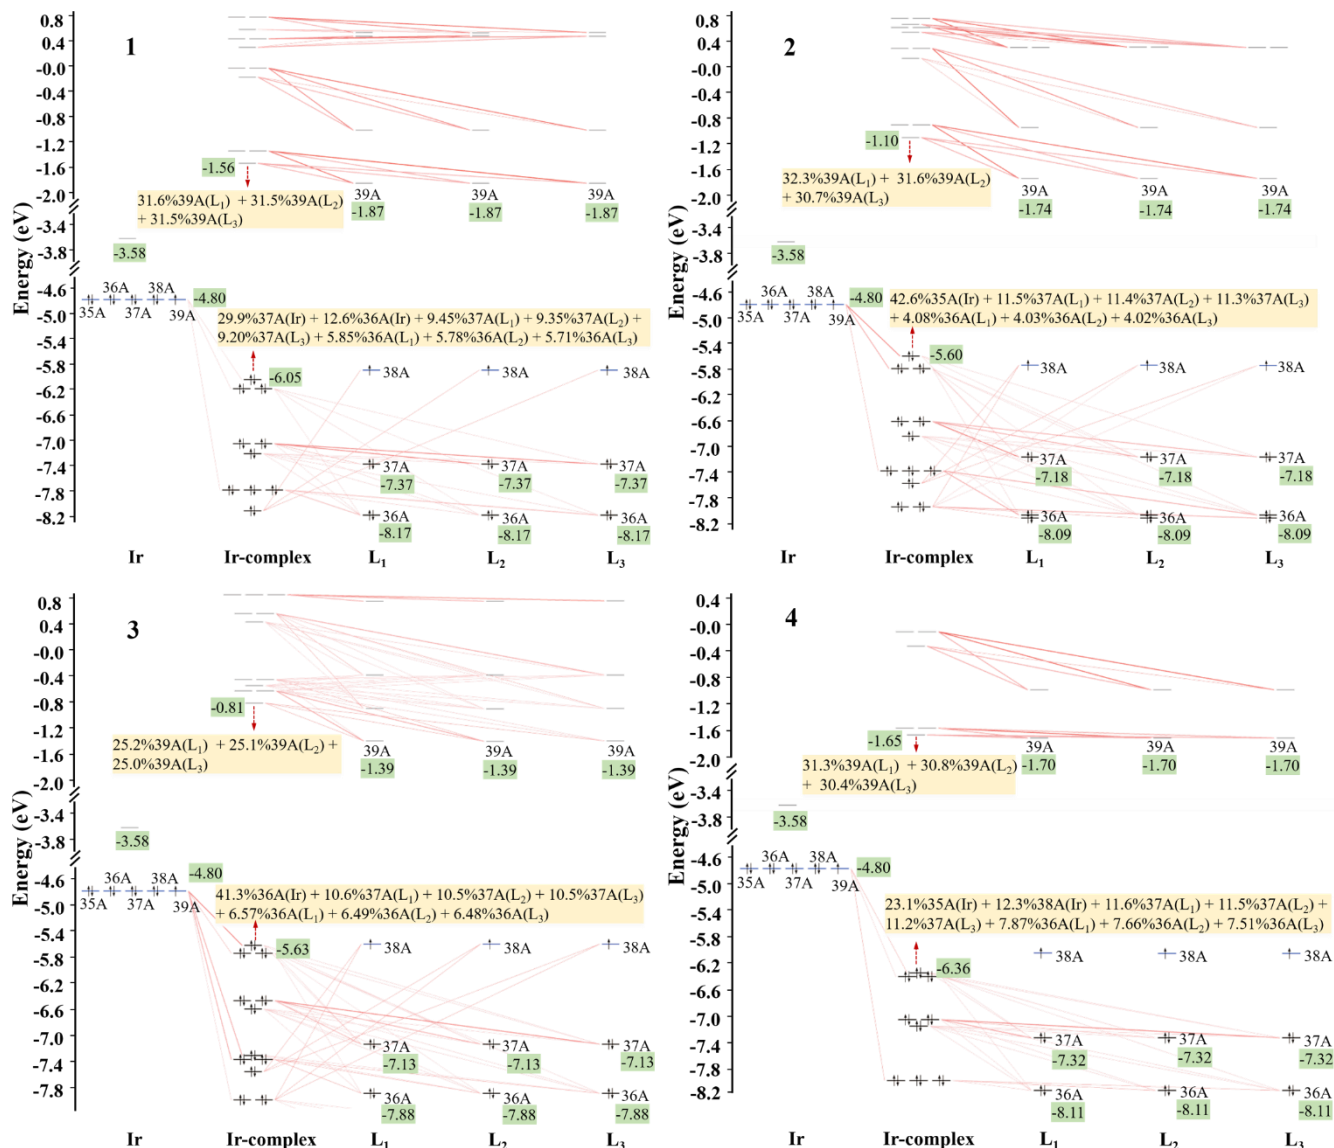

**Table S4.** Calculated absorption excited energies, dominant orbital excitations, and oscillator strength from TD-DFT calculations for the complexes **1-4**.

| Comd                 | State           | Excitation            | $\lambda(\text{nm})$ | $f$    |
|----------------------|-----------------|-----------------------|----------------------|--------|
| <b>1</b>             | T <sub>1</sub>  | HOMO→LUMO (43.9%)     | 412.9                | 0.00   |
|                      |                 | HOMO-2→LUMO+1(9.46%)  |                      |        |
|                      |                 | HOMO-1→LUMO+2(9.46%)  |                      |        |
|                      | T <sub>2</sub>  | HOMO→LUMO+2(16.9%)    | 409.6                | 0.00   |
|                      |                 | HOMO→LUMO+1(15.8%)    |                      |        |
|                      |                 | HOMO-2→LUMO (14.2%)   |                      |        |
|                      |                 | HOMO-3→LUMO (11.9%)   |                      |        |
|                      | S <sub>1</sub>  | HOMO→LUMO (97.9%)     | 353.3                | 0.0201 |
|                      | S <sub>4</sub>  | HOMO-1→LUMO (89.7%)   | 333.2                | 0.0364 |
|                      | S <sub>28</sub> | HOMO→LUMO+6(39.5%)    | 231.0                | 0.1678 |
|                      | S <sub>50</sub> | HOMO-2→LUMO+7(22.1%)  | 217.6                | 0.2445 |
|                      |                 | HOMO-1→LUMO+8(22.1%)  |                      |        |
|                      |                 | HOMO-1→LUMO+7(11.6%)  |                      |        |
| HOMO-2→LUMO+8(11.6%) |                 |                       |                      |        |
| <b>2</b>             | T <sub>1</sub>  | HOMO→LUMO (48.4%)     | 415.7                | 0.00   |
|                      |                 | HOMO-1→LUMO+2 (8.38%) |                      |        |
|                      |                 | HOMO-2→LUMO+1 (8.38%) |                      |        |
|                      | T <sub>2</sub>  | HOMO→LUMO+1(24.9%)    | 411.5                | 0.00   |
|                      |                 | HOMO-2→LUMO (12.7%)   |                      |        |
|                      |                 | HOMO→LUMO+2(12.4%)    |                      |        |
|                      |                 | HOMO-3→LUMO (12.0%)   |                      |        |
|                      | S <sub>1</sub>  | HOMO→LUMO (97.6%)     | 355.6                | 0.0217 |
|                      | S <sub>4</sub>  | HOMO-1→LUMO (92.8%)   | 329.4                | 0.0437 |
|                      | S <sub>18</sub> | HOMO-3→LUMO+2(22.9%)  | 246.1                | 0.1152 |
|                      |                 | HOMO-4→LUMO+1(22.9%)  |                      |        |
|                      | S <sub>28</sub> | HOMO-5→LUMO+1(45.0%)  | 234.0                | 0.1003 |
|                      |                 | HOMO→LUMO+7(13.2%)    |                      |        |
|                      | S <sub>41</sub> | HOMO-2→LUMO+8(24.5%)  | 224.9                | 0.1063 |
|                      |                 | HOMO-1→LUMO+7(24.5%)  |                      |        |
|                      |                 | HOMO-1-LUMO+8(12.8%)  |                      |        |
|                      |                 | HOMO-2-LUMO+7(12.8%)  |                      |        |
|                      | S <sub>48</sub> | HOMO-6→LUMO+1(13.2%)  | 216.8                | 0.2057 |
|                      |                 | HOMO-7→LUMO+2(13.2%)  |                      |        |
|                      |                 | HOMO-6→LUMO+2(11.9%)  |                      |        |
| HOMO-7→LUMO+1(11.9%) |                 |                       |                      |        |
| <b>3</b>             | T <sub>1</sub>  | HOMO→LUMO+3(15.2%)    | 390.9                | 0.00   |
|                      |                 | HOMO-3→LUMO+4(8.20%)  |                      |        |
|                      |                 | HOMO-4→LUMO+5(8.20%)  |                      |        |
|                      |                 | HOMO-5→LUMO (8.10%)   |                      |        |
|                      | T <sub>2</sub>  | HOMO→LUMO+4(15.9%)    | 390.5                | 0.00   |
|                      |                 | HOMO-3→LUMO (8.70%)   |                      |        |
|                      | S <sub>1</sub>  | HOMO→LUMO+3(64.1%)    | 316.7                | 0.0027 |

|          |                 |                      |       |        |
|----------|-----------------|----------------------|-------|--------|
|          |                 | HOMO→LUMO (29.7%)    |       |        |
|          | S <sub>12</sub> | HOMO-1→LUMO+3(27.0%) | 293.3 | 0.0601 |
|          |                 | HOMO-1→LUMO+1(15.8%) |       |        |
|          |                 | HOMO-2→LUMO+2(15.8%) |       |        |
|          | S <sub>43</sub> | HOMO-5→LUMO+5(31.7%) | 224.8 | 0.1139 |
|          |                 | HOMO-1→LUMO+6(8.85%) |       |        |
|          | S <sub>45</sub> | HOMO-6→LUMO (20.7%)  | 221.3 | 0.0837 |
|          |                 | HOMO-6→LUMO+3(13.5%) |       |        |
| <b>4</b> | T <sub>1</sub>  | HOMO→LUMO (27.1%)    | 404.4 | 0.00   |
|          |                 | HOM-1→LUMO+1(15.3%)  |       |        |
|          |                 | HOMO-2→LUMO+2(15.2%) |       |        |
|          | T <sub>2</sub>  | HOMO→LUMO+2(20.8%)   | 403.9 | 0.00   |
|          |                 | HOMO-2→LUMO (17.8%)  |       |        |
|          | S <sub>1</sub>  | HOMO→LUMO (91.2%)    | 336.9 | 0.0220 |
|          | S <sub>7</sub>  | HOMO-1→LUMO+1(24.8%) | 314.2 | 0.0646 |
|          |                 | HOMO-2→LUMO+2(24.8%) |       |        |
|          |                 | HOMO-1→LUMO+2(17.1%) |       |        |
|          |                 | HOMO-2→LUMO+1(17.1%) |       |        |
|          | S <sub>12</sub> | HOMO-4→LUMO+1(35.6%) | 261.1 | 0.1866 |
|          |                 | HOMO-3→LUMO+2(35.6%) |       |        |
|          |                 | HOMO-5→LUMO (11.6%)  |       |        |
|          | S <sub>33</sub> | HOMO-8→LUMO+1(26.1%) | 222.9 | 0.1437 |
|          |                 | HOMO-7→LUMO+2(26.1%) |       |        |
|          |                 | HOMO-2→LUMO+5(10.9%) |       |        |
|          |                 | HOMO-1→LUMO+4(10.9%) |       |        |

**Figure S2.** Simulated vibronically-resolved emission spectrum by Franck-Condon calculations for **1-4**.

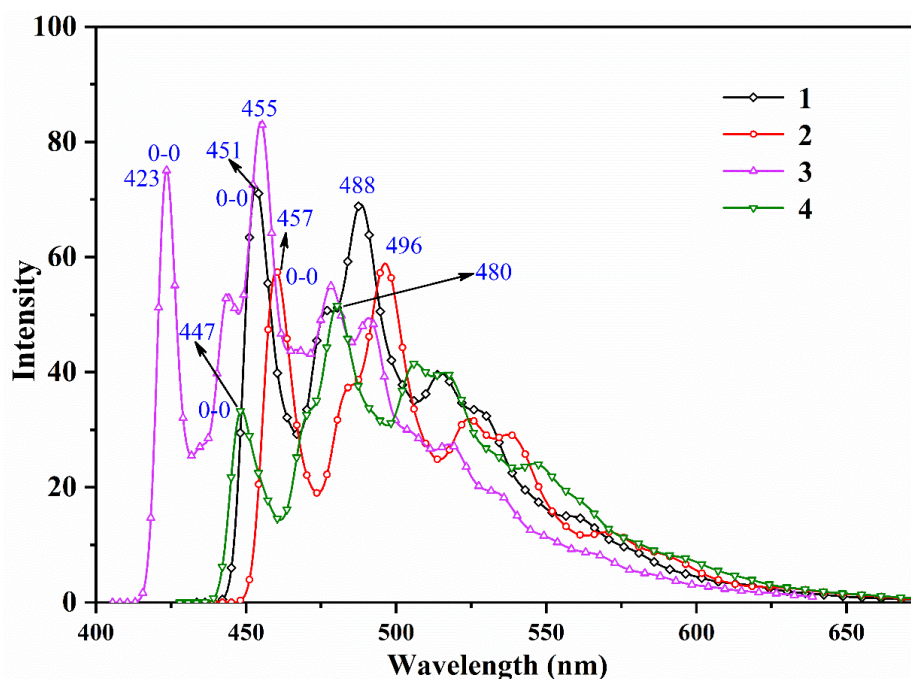

**Figure S3.** Energy-level diagrams of the  $T_1$  and five  $S_n$  states with their dominant excitation in **1-4**. The values in parentheses are the coefficients of the excited-state configuration and percentage of Ir d in the occupied orbitals, respectively.

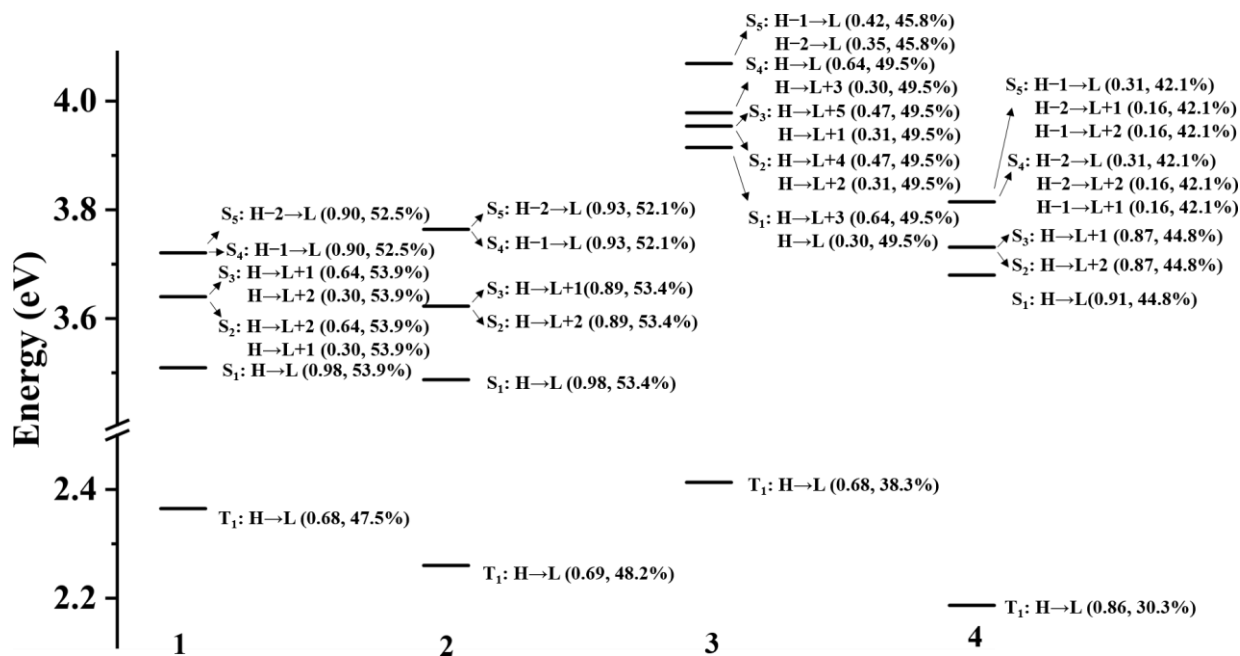



## Analysis of the substituent effect:

Considering the effect of the substitution effect on  $k_{nr1}$ , we introduced a phenyl substituent on complex **2**, and the value of its  $k_{nr1}$  was calculated are listed in the following **Table S5**.

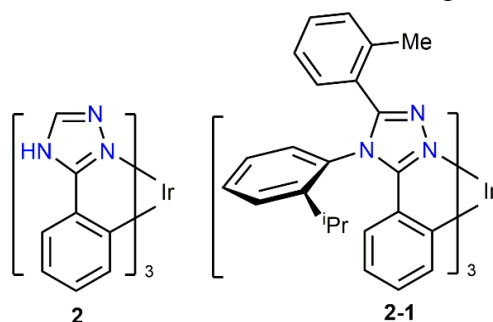

**Table S5.** Calculated  $k_{nr1}$  of the complexes **2-1** with phenyl substituted **ptz2** (Complex **2** as a reference).

| Compd.            | <b>2</b>           | <b>2-1</b>         |
|-------------------|--------------------|--------------------|
| $\Delta E_{00}$   | 21856.2            | 20969.0            |
| SOC <sup>a</sup>  | 224.6              | 192.3              |
| $S_s$             | 1.571              | 8.659              |
| $S_c$             | 0.488              | 1.997              |
| $S_f$             | 2.020              | 1.668              |
| $\lambda_s$       | 140.1              | 350.6              |
| $\lambda_c$       | 227.8              | 232.7              |
| $\lambda_f$       | 2846.9             | 2396.0             |
| $\lambda_{total}$ | 3214.8             | 2979.3             |
| $\hbar\omega_s$   | 89.2               | 40.5               |
| $\hbar\omega_c$   | 466.9              | 116.5              |
| $\hbar\omega_f$   | 1409.1             | 1436.4             |
| $\gamma_0$        | 1.038              | 1.169              |
| $k_{nr1}$         | $4.17 \times 10^4$ | $1.29 \times 10^4$ |

<sup>a</sup> SOC denoted as  $\langle T_1 | H_{soc} | S_0 \rangle$ , which were calculated with PySOC package<sup>[1,2]</sup>.

It can be seen from the calculation  $k_{nr1}$  that the introduction of the substituent is advantageous for suppressing the temperature-independent non-radiative decay process, which is beneficial for improving the quantum efficiency.

[1] X Gao, S Bai, D Fazzi, T Niehaus, M Barbatti, and W Thiel. *J. Chem. Theory Comput.* 2017, **13**, 515–524.

[2] SG Chiodo, M Leopoldini. *Comput. Phys. Commun.* 2014, **185**, 676–683.

Figure S4. Spin densities of the  $^3\text{MC}$  states for all investigate complexes (isovalue = 0.002).

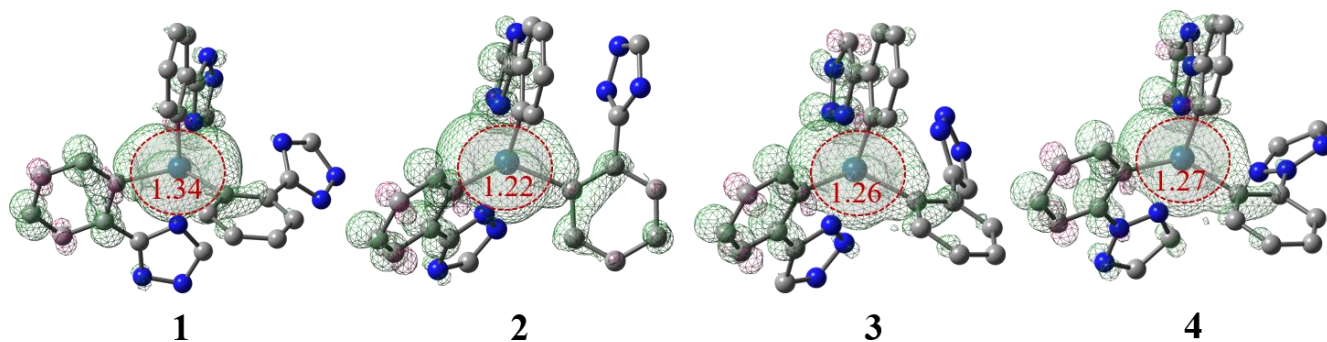

Figure S5. The curve of intrinsic reaction coordinate (IRC) of  $^3\text{TS}$  [ $T_1/^3\text{MC}$ ] for 1-4.

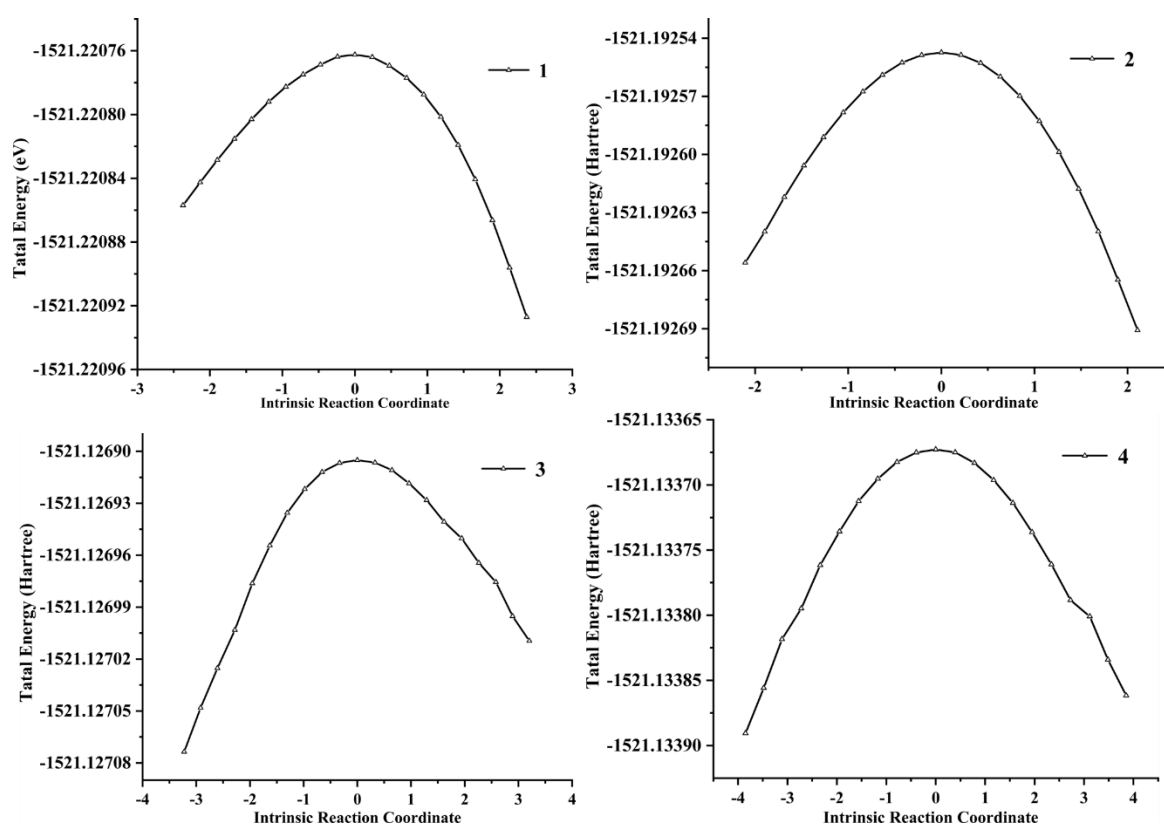

Figure S6. The optimized structures of the  $^3\text{TS}$  [ $T_1-^3\text{MC}$ ] for 1-4.

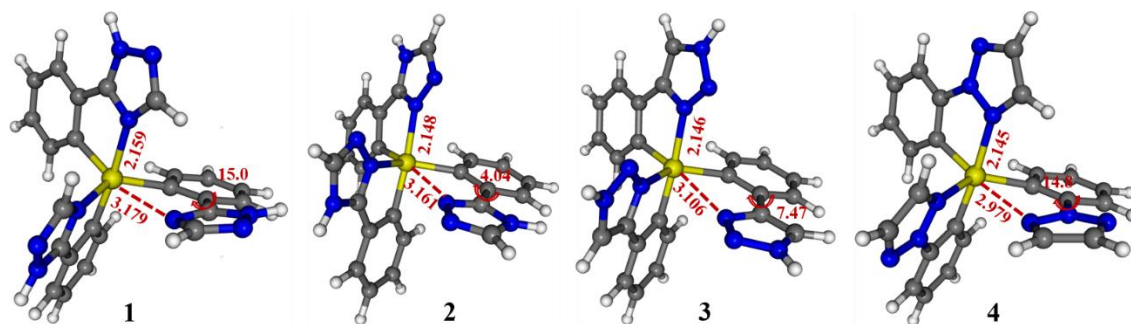

**Table S6.** Vibrational frequencies ( $\text{cm}^{-1}$ ) at the respective optimized  $\text{S}_0$  and  $\text{T}_1$  states, dimensionless displacement  $\Delta Q_i$ , Huang-Rhys factors  $S_i$  and reorganization energy  $\lambda_i$  ( $\text{cm}^{-1}$ ) of **1**.

| $\omega_i(\text{S}_0)$ | $\Delta Q_i$ | $S_i$    | $\lambda_i$ | $\omega_i(\text{T}_1)$ | $\omega_i(\text{S}_0)$ | $\Delta Q_i$ | $S_i$    | $\lambda_i$ | $\omega_i(\text{T}_1)$ |
|------------------------|--------------|----------|-------------|------------------------|------------------------|--------------|----------|-------------|------------------------|
| 33                     | -0.126       | 7.94E-03 | 0.3         | 30                     | 1013                   | -0.355       | 6.30E-02 | 63.7        | 1009                   |
| 33                     | 0.545        | 1.49E-01 | 4.8         | 34                     | 1013                   | -0.048       | 1.15E-03 | 1.1         | 1012                   |
| 34                     | 0.124        | 7.69E-03 | 0.3         | 37                     | 1017                   | 0.109        | 5.94E-03 | 6           | 1013                   |
| 46                     | -0.07        | 2.45E-03 | 0.1         | 44                     | 1060                   | -0.743       | 2.76E-01 | 292.5       | 1014                   |
| 46                     | 0.683        | 2.33E-01 | 10.8        | 47                     | 1060                   | 0.04         | 8.00E-04 | 0.9         | 1017                   |
| 54                     | -0.539       | 1.45E-01 | 7.8         | 52                     | 1068                   | 0.312        | 4.87E-02 | 51.9        | 1061                   |
| 92                     | 0.022        | 2.42E-04 | 0           | 71                     | 1078                   | -0.034       | 5.78E-04 | 0.6         | 1065                   |
| 92                     | -0.066       | 2.18E-03 | 0.2         | 96                     | 1078                   | -0.302       | 4.56E-02 | 49.1        | 1072                   |
| 95                     | 0.306        | 4.68E-02 | 4.5         | 97                     | 1085                   | -0.326       | 5.31E-02 | 57.5        | 1078                   |
| 156                    | 0.309        | 4.77E-02 | 7.5         | 142                    | 1130                   | -0.195       | 1.90E-02 | 21.5        | 1082                   |
| 159                    | 0.394        | 7.76E-02 | 12.4        | 155                    | 1131                   | 0.238        | 2.83E-02 | 31.9        | 1122                   |
| 159                    | 0.133        | 8.84E-03 | 1.4         | 159                    | 1131                   | -0.089       | 3.96E-03 | 4.4         | 1133                   |
| 173                    | 0.131        | 8.58E-03 | 1.5         | 160                    | 1149                   | 0.057        | 1.62E-03 | 1.9         | 1133                   |
| 175                    | -0.606       | 1.84E-01 | 32.2        | 170                    | 1149                   | -0.006       | 1.80E-05 | 0           | 1148                   |
| 175                    | -0.279       | 3.89E-02 | 6.8         | 173                    | 1151                   | -0.036       | 6.48E-04 | 0.7         | 1150                   |
| 191                    | 0.104        | 5.41E-03 | 1           | 188                    | 1176                   | 0.112        | 6.27E-03 | 7.3         | 1152                   |
| 214                    | 0.098        | 4.80E-03 | 1           | 200                    | 1176                   | 0.003        | 4.50E-06 | 0           | 1176                   |
| 214                    | 0.165        | 1.36E-02 | 2.9         | 211                    | 1177                   | 0.104        | 5.41E-03 | 6.3         | 1177                   |
| 232                    | 0.34         | 5.78E-02 | 13.4        | 214                    | 1190                   | 0.129        | 8.32E-03 | 9.9         | 1180                   |
| 232                    | -0.053       | 1.40E-03 | 0.3         | 228                    | 1190                   | -0.199       | 1.98E-02 | 23.5        | 1190                   |
| 260                    | 0.364        | 6.62E-02 | 17.2        | 228                    | 1190                   | -0.03        | 4.50E-04 | 0.5         | 1191                   |
| 283                    | -0.428       | 9.16E-02 | 25.9        | 253                    | 1248                   | 0.088        | 3.87E-03 | 4.8         | 1206                   |
| 316                    | -0.044       | 9.68E-04 | 0.3         | 268                    | 1248                   | -0.074       | 2.74E-03 | 3.4         | 1247                   |
| 316                    | 0.066        | 2.18E-03 | 0.7         | 279                    | 1249                   | 0.085        | 3.61E-03 | 4.5         | 1248                   |
| 321                    | 0.402        | 8.08E-02 | 25.9        | 302                    | 1285                   | 0.034        | 5.78E-04 | 0.8         | 1252                   |
| 321                    | -0.04        | 8.00E-04 | 0.3         | 314                    | 1285                   | -0.064       | 2.05E-03 | 2.7         | 1288                   |
| 325                    | -0.16        | 1.28E-02 | 4.1         | 320                    | 1286                   | -0.07        | 2.45E-03 | 3.1         | 1293                   |
| 404                    | -0.075       | 2.81E-03 | 1.1         | 323                    | 1345                   | 0.032        | 5.12E-04 | 0.7         | 1327                   |
| 404                    | -0.04        | 8.00E-04 | 0.3         | 401                    | 1345                   | -0.084       | 3.53E-03 | 4.8         | 1348                   |
| 414                    | 0.007        | 2.45E-05 | 0           | 403                    | 1346                   | -0.045       | 1.01E-03 | 1.3         | 1349                   |
| 461                    | 0.136        | 9.25E-03 | 4.2         | 406                    | 1357                   | 0.082        | 3.36E-03 | 4.5         | 1357                   |
| 461                    | -0.08        | 3.20E-03 | 1.5         | 415                    | 1357                   | -0.094       | 4.42E-03 | 6           | 1357                   |
| 467                    | -0.022       | 2.42E-04 | 0.1         | 464                    | 1357                   | -0.089       | 3.96E-03 | 5.3         | 1359                   |
| 505                    | 0.166        | 1.38E-02 | 7           | 465                    | 1377                   | -0.217       | 2.35E-02 | 32.4        | 1379                   |
| 507                    | 0.168        | 1.41E-02 | 7.1         | 470                    | 1378                   | -0.202       | 2.04E-02 | 28          | 1379                   |
| 507                    | -0.201       | 2.02E-02 | 10.3        | 503                    | 1378                   | 0.22         | 2.42E-02 | 33.5        | 1383                   |
| 541                    | -0.058       | 1.68E-03 | 0.9         | 506                    | 1438                   | 0.212        | 2.25E-02 | 32.3        | 1402                   |
| 541                    | 0.066        | 2.18E-03 | 1.2         | 507                    | 1438                   | -0.335       | 5.61E-02 | 80.8        | 1440                   |
| 541                    | -0.094       | 4.42E-03 | 2.4         | 539                    | 1441                   | 0.268        | 3.59E-02 | 51.6        | 1442                   |
| 574                    | -0.054       | 1.46E-03 | 0.8         | 541                    | 1484                   | 0.16         | 1.28E-02 | 19          | 1448                   |

|      |        |          |      |     |      |        |          |       |      |
|------|--------|----------|------|-----|------|--------|----------|-------|------|
| 574  | -0.03  | 4.50E-04 | 0.3  | 578 | 1484 | 0.3    | 4.50E-02 | 66.9  | 1452 |
| 575  | 0.032  | 5.12E-04 | 0.3  | 580 | 1486 | 0.221  | 2.44E-02 | 36.1  | 1485 |
| 669  | -0.504 | 1.27E-01 | 85.1 | 612 | 1499 | 0.148  | 1.10E-02 | 16.4  | 1487 |
| 669  | 0.141  | 9.94E-03 | 6.6  | 637 | 1499 | -0.192 | 1.84E-02 | 27.5  | 1493 |
| 671  | 0.444  | 9.86E-02 | 66.3 | 665 | 1499 | 0.057  | 1.62E-03 | 2.5   | 1496 |
| 689  | 0.005  | 1.25E-05 | 0    | 669 | 1581 | 0.193  | 1.86E-02 | 29.5  | 1498 |
| 689  | -0.025 | 3.13E-04 | 0.2  | 670 | 1581 | -0.128 | 8.19E-03 | 12.9  | 1500 |
| 689  | 0.039  | 7.61E-04 | 0.5  | 680 | 1581 | -0.117 | 6.84E-03 | 10.7  | 1579 |
| 718  | 0.015  | 1.13E-04 | 0.1  | 687 | 1609 | 0.125  | 7.81E-03 | 12.6  | 1580 |
| 718  | -0.027 | 3.65E-04 | 0.3  | 688 | 1609 | -0.736 | 2.71E-01 | 435.2 | 1587 |
| 718  | 0.024  | 2.88E-04 | 0.2  | 689 | 1610 | 0.542  | 1.47E-01 | 236.2 | 1611 |
| 740  | -0.035 | 6.13E-04 | 0.4  | 720 | 1636 | -0.166 | 1.38E-02 | 22.7  | 1612 |
| 741  | 0.022  | 2.42E-04 | 0.2  | 721 | 1636 | -0.032 | 5.12E-04 | 0.9   | 1637 |
| 741  | -0.003 | 4.50E-06 | 0    | 733 | 1636 | -0.106 | 5.62E-03 | 9.2   | 1638 |
| 764  | 0.008  | 3.20E-05 | 0    | 740 | 1681 | 0.537  | 1.44E-01 | 242.6 | 1652 |
| 765  | 0.007  | 2.45E-05 | 0    | 742 | 1681 | 0.282  | 3.98E-02 | 67    | 1680 |
| 765  | -0.05  | 1.25E-03 | 1    | 763 | 1684 | -0.439 | 9.64E-02 | 162.5 | 1682 |
| 808  | 0.032  | 5.12E-04 | 0.4  | 764 | 3181 | -0.013 | 8.45E-05 | 0.3   | 3184 |
| 808  | -0.006 | 1.80E-05 | 0    | 765 | 3181 | -0.025 | 3.13E-04 | 1     | 3185 |
| 811  | -0.035 | 6.13E-04 | 0.5  | 808 | 3181 | 0.023  | 2.65E-04 | 0.8   | 3193 |
| 890  | 0.005  | 1.25E-05 | 0    | 811 | 3201 | 0.03   | 4.50E-04 | 1.4   | 3202 |
| 890  | 0.01   | 5.00E-05 | 0    | 892 | 3201 | 0.001  | 5.00E-07 | 0     | 3204 |
| 893  | -0.014 | 9.80E-05 | 0.1  | 894 | 3201 | 0.023  | 2.65E-04 | 0.9   | 3212 |
| 896  | -0.003 | 4.50E-06 | 0    | 896 | 3229 | 0.001  | 5.00E-07 | 0     | 3219 |
| 896  | -0.005 | 1.25E-05 | 0    | 898 | 3229 | 0.004  | 8.00E-06 | 0     | 3224 |
| 899  | 0.018  | 1.62E-04 | 0.1  | 901 | 3229 | 0      | 0.00E+00 | 0     | 3224 |
| 951  | -0.011 | 6.05E-05 | 0.1  | 937 | 3235 | 0.006  | 1.80E-05 | 0.1   | 3233 |
| 951  | 0.012  | 7.20E-05 | 0.1  | 938 | 3235 | 0.008  | 3.20E-05 | 0.1   | 3234 |
| 951  | -0.02  | 2.00E-04 | 0.2  | 954 | 3235 | 0.008  | 3.20E-05 | 0.1   | 3240 |
| 993  | 0.311  | 4.84E-02 | 48.2 | 954 | 3315 | 0.001  | 5.00E-07 | 0     | 3302 |
| 993  | 0.115  | 6.61E-03 | 6.5  | 963 | 3315 | 0.002  | 2.00E-06 | 0     | 3316 |
| 994  | -0.265 | 3.51E-02 | 34.9 | 990 | 3315 | -0.001 | 5.00E-07 | 0     | 3318 |
| 1010 | -0.02  | 2.00E-04 | 0.2  | 993 | 3725 | 0.014  | 9.80E-05 | 0.4   | 3724 |
| 1010 | -0.014 | 9.80E-05 | 0.1  | 994 | 3725 | 0.032  | 5.12E-04 | 1.9   | 3724 |
| 1011 | 0.021  | 2.21E-04 | 0.2  | 995 | 3725 | 0.022  | 2.42E-04 | 0.9   | 3751 |

**Table S7.** Vibrational frequencies ( $\text{cm}^{-1}$ ) at the respective optimized  $\text{S}_0$  and  $\text{T}_1$  states, dimensionless displacement  $\Delta Q_i$ , Huang-Rhys factors  $S_i$  and reorganization energy  $\lambda_i$  ( $\text{cm}^{-1}$ ) of **2**.

| $\omega_i(\text{S}_0)$ | $\Delta Q_i$ | $S_i$    | $\lambda_i$ | $\omega_i(\text{T}_1)$ | $\omega_i(\text{S}_0)$ | $\Delta Q_i$ | $S_i$    | $\lambda_i$ | $\omega_i(\text{T}_1)$ |
|------------------------|--------------|----------|-------------|------------------------|------------------------|--------------|----------|-------------|------------------------|
| 31                     | 0.485        | 1.18E-01 | 3.7         | 30                     | 1006                   | 0.03         | 4.50E-04 | 0.5         | 1000                   |
| 31                     | -0.203       | 2.06E-02 | 0.6         | 33                     | 1006                   | -0.057       | 1.62E-03 | 1.6         | 1001                   |
| 34                     | 0.766        | 2.93E-01 | 10          | 37                     | 1006                   | 0.006        | 1.80E-05 | 0           | 1006                   |
| 45                     | -0.721       | 2.60E-01 | 11.8        | 46                     | 1058                   | 0.391        | 7.64E-02 | 80.7        | 1008                   |
| 45                     | 0.68         | 2.31E-01 | 10.5        | 47                     | 1058                   | 0.567        | 1.61E-01 | 169.8       | 1012                   |
| 52                     | 0.26         | 3.38E-02 | 1.7         | 52                     | 1066                   | -0.298       | 4.44E-02 | 47.5        | 1059                   |
| 93                     | -0.152       | 1.16E-02 | 1.1         | 72                     | 1074                   | -0.173       | 1.50E-02 | 16          | 1062                   |
| 93                     | 0.022        | 2.42E-04 | 0           | 93                     | 1074                   | 0.116        | 6.73E-03 | 7.2         | 1067                   |
| 94                     | 0.258        | 3.33E-02 | 3.1         | 99                     | 1076                   | -0.237       | 2.81E-02 | 30.2        | 1074                   |
| 160                    | -0.35        | 6.13E-02 | 9.8         | 145                    | 1125                   | -0.084       | 3.53E-03 | 4           | 1078                   |
| 163                    | -0.454       | 1.03E-01 | 16.7        | 157                    | 1126                   | 0.153        | 1.17E-02 | 13.2        | 1111                   |
| 163                    | -0.327       | 5.35E-02 | 8.7         | 163                    | 1126                   | 0.127        | 8.06E-03 | 9.1         | 1128                   |
| 174                    | 0.2          | 2.00E-02 | 3.5         | 165                    | 1130                   | -0.105       | 5.51E-03 | 6.3         | 1129                   |
| 178                    | 0.198        | 1.96E-02 | 3.5         | 174                    | 1130                   | 0.244        | 2.98E-02 | 33.7        | 1131                   |
| 178                    | -0.789       | 3.11E-01 | 55.3        | 179                    | 1134                   | -0.195       | 1.90E-02 | 21.5        | 1133                   |
| 188                    | 0.03         | 4.50E-04 | 0.1         | 183                    | 1169                   | -0.112       | 6.27E-03 | 7.3         | 1146                   |
| 215                    | -0.187       | 1.75E-02 | 3.8         | 195                    | 1169                   | 0.166        | 1.38E-02 | 16.1        | 1169                   |
| 215                    | 0.013        | 8.45E-05 | 0           | 213                    | 1173                   | 0.158        | 1.25E-02 | 14.6        | 1171                   |
| 234                    | 0.338        | 5.71E-02 | 13.4        | 220                    | 1186                   | 0.058        | 1.68E-03 | 2           | 1173                   |
| 234                    | 0.072        | 2.59E-03 | 0.6         | 227                    | 1186                   | 0.005        | 1.25E-05 | 0           | 1187                   |
| 265                    | 0.202        | 2.04E-02 | 5.4         | 230                    | 1187                   | -0.082       | 3.36E-03 | 4           | 1188                   |
| 288                    | -0.259       | 3.35E-02 | 9.7         | 256                    | 1189                   | -0.101       | 5.10E-03 | 6           | 1189                   |
| 318                    | -0.205       | 2.10E-02 | 6.7         | 269                    | 1189                   | -0.157       | 1.23E-02 | 14.7        | 1190                   |
| 318                    | -0.11        | 6.05E-03 | 1.9         | 284                    | 1191                   | -0.098       | 4.80E-03 | 5.7         | 1200                   |
| 324                    | -0.268       | 3.59E-02 | 11.6        | 305                    | 1275                   | 0.085        | 3.61E-03 | 4.6         | 1233                   |
| 324                    | -0.158       | 1.25E-02 | 4.1         | 317                    | 1275                   | 0.048        | 1.15E-03 | 1.5         | 1254                   |
| 326                    | -0.209       | 2.18E-02 | 7.1         | 321                    | 1275                   | 0.089        | 3.96E-03 | 5.1         | 1276                   |
| 403                    | 0.01         | 5.00E-05 | 0           | 324                    | 1301                   | -0.058       | 1.68E-03 | 2.2         | 1280                   |
| 403                    | 0.165        | 1.36E-02 | 5.5         | 400                    | 1301                   | 0.027        | 3.65E-04 | 0.5         | 1302                   |
| 412                    | 0.034        | 5.78E-04 | 0.2         | 402                    | 1302                   | -0.052       | 1.35E-03 | 1.8         | 1303                   |
| 459                    | 0.004        | 8.00E-06 | 0           | 405                    | 1358                   | -0.15        | 1.13E-02 | 15.2        | 1332                   |
| 459                    | -0.08        | 3.20E-03 | 1.5         | 415                    | 1358                   | 0.031        | 4.81E-04 | 0.7         | 1356                   |
| 463                    | 0.019        | 1.81E-04 | 0.1         | 458                    | 1358                   | -0.112       | 6.27E-03 | 8.5         | 1360                   |
| 508                    | -0.039       | 7.61E-04 | 0.4         | 464                    | 1402                   | 0.313        | 4.90E-02 | 68.8        | 1362                   |
| 508                    | -0.029       | 4.21E-04 | 0.2         | 484                    | 1402                   | 0.327        | 5.35E-02 | 74.9        | 1402                   |
| 508                    | -0.082       | 3.36E-03 | 1.7         | 500                    | 1402                   | 0.315        | 4.96E-02 | 69.5        | 1403                   |
| 542                    | 0.047        | 1.10E-03 | 0.6         | 507                    | 1460                   | -0.337       | 5.68E-02 | 82.9        | 1414                   |
| 543                    | 0.006        | 1.80E-05 | 0           | 511                    | 1460                   | 0.203        | 2.06E-02 | 30.1        | 1428                   |
| 543                    | -0.04        | 8.00E-04 | 0.4         | 540                    | 1463                   | 0.257        | 3.30E-02 | 48.3        | 1442                   |
| 558                    | -0.186       | 1.73E-02 | 9.7         | 542                    | 1481                   | 0.025        | 3.13E-04 | 0.5         | 1460                   |

|      |        |          |      |     |      |        |          |       |      |
|------|--------|----------|------|-----|------|--------|----------|-------|------|
| 559  | 0.216  | 2.33E-02 | 13.1 | 559 | 1481 | 0.194  | 1.88E-02 | 27.9  | 1462 |
| 559  | -0.122 | 7.44E-03 | 4.2  | 561 | 1481 | 0.136  | 9.25E-03 | 13.7  | 1481 |
| 668  | -0.083 | 3.44E-03 | 2.3  | 606 | 1521 | 0.041  | 8.41E-04 | 1.3   | 1482 |
| 668  | 0.434  | 9.42E-02 | 63   | 637 | 1521 | 0.094  | 4.42E-03 | 6.8   | 1506 |
| 670  | -0.402 | 8.08E-02 | 54.2 | 655 | 1521 | -0.034 | 5.78E-04 | 0.9   | 1520 |
| 680  | -0.001 | 5.00E-07 | 0    | 667 | 1561 | 0.329  | 5.41E-02 | 84.5  | 1522 |
| 680  | -0.035 | 6.13E-04 | 0.4  | 670 | 1561 | 0.114  | 6.50E-03 | 10.1  | 1542 |
| 681  | -0.041 | 8.41E-04 | 0.6  | 679 | 1561 | -0.45  | 1.01E-01 | 157.8 | 1561 |
| 717  | -0.001 | 5.00E-07 | 0    | 680 | 1607 | 0.581  | 1.69E-01 | 271.4 | 1562 |
| 717  | 0.065  | 2.11E-03 | 1.5  | 682 | 1607 | -0.386 | 7.45E-02 | 119.6 | 1593 |
| 717  | -0.005 | 1.25E-05 | 0    | 691 | 1609 | 0.504  | 1.27E-01 | 204.3 | 1610 |
| 737  | 0.045  | 1.01E-03 | 0.7  | 718 | 1634 | -0.107 | 5.72E-03 | 9.4   | 1611 |
| 738  | -0.017 | 1.45E-04 | 0.1  | 720 | 1634 | -0.007 | 2.45E-05 | 0     | 1636 |
| 738  | -0.008 | 3.20E-05 | 0    | 732 | 1635 | 0.059  | 1.74E-03 | 2.8   | 1636 |
| 760  | -0.033 | 5.45E-04 | 0.4  | 738 | 1681 | -0.703 | 2.47E-01 | 414.8 | 1678 |
| 762  | -0.032 | 5.12E-04 | 0.4  | 739 | 1681 | -0.355 | 6.30E-02 | 105.9 | 1680 |
| 762  | -0.028 | 3.92E-04 | 0.3  | 759 | 1683 | 0.573  | 1.64E-01 | 275.9 | 1684 |
| 793  | 0.009  | 4.05E-05 | 0    | 760 | 3174 | -0.012 | 7.20E-05 | 0.2   | 3177 |
| 793  | 0.016  | 1.28E-04 | 0.1  | 762 | 3174 | 0.024  | 2.88E-04 | 0.9   | 3178 |
| 794  | -0.047 | 1.10E-03 | 0.9  | 782 | 3174 | 0.023  | 2.65E-04 | 0.8   | 3187 |
| 815  | -0.002 | 2.00E-06 | 0    | 796 | 3197 | -0.013 | 8.45E-05 | 0.3   | 3198 |
| 815  | -0.02  | 2.00E-04 | 0.2  | 797 | 3197 | 0.021  | 2.21E-04 | 0.7   | 3201 |
| 816  | 0.039  | 7.61E-04 | 0.6  | 818 | 3197 | 0.02   | 2.00E-04 | 0.6   | 3206 |
| 887  | 0.004  | 8.00E-06 | 0    | 819 | 3222 | 0.009  | 4.05E-05 | 0.1   | 3214 |
| 887  | -0.004 | 8.00E-06 | 0    | 887 | 3222 | 0.004  | 8.00E-06 | 0     | 3220 |
| 889  | -0.023 | 2.65E-04 | 0.2  | 891 | 3223 | 0.007  | 2.45E-05 | 0.1   | 3222 |
| 945  | -0.002 | 2.00E-06 | 0    | 911 | 3229 | 0.001  | 5.00E-07 | 0     | 3230 |
| 945  | 0.023  | 2.65E-04 | 0.2  | 932 | 3229 | -0.009 | 4.05E-05 | 0.1   | 3230 |
| 945  | 0.035  | 6.13E-04 | 0.6  | 947 | 3230 | -0.01  | 5.00E-05 | 0.1   | 3233 |
| 985  | -0.098 | 4.80E-03 | 4.7  | 951 | 3318 | -0.003 | 4.50E-06 | 0     | 3310 |
| 985  | 0.083  | 3.44E-03 | 3.4  | 952 | 3318 | -0.003 | 4.50E-06 | 0     | 3318 |
| 985  | -0.186 | 1.73E-02 | 17.1 | 959 | 3318 | -0.004 | 8.00E-06 | 0     | 3318 |
| 999  | 0.296  | 4.38E-02 | 43.8 | 985 | 3727 | 0.028  | 3.92E-04 | 1.4   | 3726 |
| 999  | -0.425 | 9.03E-02 | 90.4 | 985 | 3727 | -0.016 | 1.28E-04 | 0.5   | 3726 |
| 1001 | 0.304  | 4.62E-02 | 46.3 | 989 | 3728 | 0.02   | 2.00E-04 | 0.7   | 3754 |

**Table S8.** Vibrational frequencies ( $\text{cm}^{-1}$ ) at the respective optimized  $\text{S}_0$  and  $\text{T}_1$  states, dimensionless displacement  $\Delta Q_i$ , Huang-Rhys factors  $S_i$  and reorganization energy  $\lambda_i$  ( $\text{cm}^{-1}$ ) of **3**.

| $\omega_i(\text{S}_0)$ | $\Delta Q_i$ | $S_i$    | $\lambda_i$ | $\omega_i(\text{T}_1)$ | $\omega_i(\text{S}_0)$ | $\Delta Q_i$ | $S_i$    | $\lambda_i$ | $\omega_i(\text{T}_1)$ |
|------------------------|--------------|----------|-------------|------------------------|------------------------|--------------|----------|-------------|------------------------|
| 32                     | 0.186        | 1.73E-02 | 0.6         | 29                     | 1013                   | 0.115        | 6.61E-03 | 6.7         | 1003                   |
| 32                     | 0.748        | 2.80E-01 | 9           | 34                     | 1013                   | -0.085       | 3.61E-03 | 3.7         | 1004                   |
| 34                     | -0.095       | 4.51E-03 | 0.2         | 35                     | 1014                   | 0.03         | 4.50E-04 | 0.5         | 1007                   |
| 47                     | -0.41        | 8.41E-02 | 3.9         | 45                     | 1061                   | -0.844       | 3.56E-01 | 378.2       | 1015                   |
| 47                     | 0.43         | 9.25E-02 | 4.3         | 47                     | 1061                   | 0            | 0.00E+00 | 0           | 1015                   |
| 54                     | 0.072        | 2.59E-03 | 0.1         | 52                     | 1068                   | 0.452        | 1.02E-01 | 109.1       | 1057                   |
| 94                     | -0.013       | 8.45E-05 | 0           | 67                     | 1080                   | -0.005       | 1.25E-05 | 0           | 1061                   |
| 94                     | 0.182        | 1.66E-02 | 1.6         | 95                     | 1080                   | 0.266        | 3.54E-02 | 38.2        | 1067                   |
| 98                     | 0.287        | 4.12E-02 | 4           | 100                    | 1084                   | 0.313        | 4.90E-02 | 53.1        | 1078                   |
| 160                    | 0.14         | 9.80E-03 | 1.6         | 148                    | 1109                   | 0.073        | 2.66E-03 | 2.9         | 1082                   |
| 164                    | -0.088       | 3.87E-03 | 0.6         | 158                    | 1109                   | 0.076        | 2.89E-03 | 3.2         | 1083                   |
| 164                    | 0.171        | 1.46E-02 | 2.4         | 162                    | 1109                   | 0.044        | 9.68E-04 | 1.1         | 1109                   |
| 176                    | 0.013        | 8.45E-05 | 0           | 167                    | 1141                   | 0.381        | 7.26E-02 | 82.7        | 1109                   |
| 180                    | -0.274       | 3.75E-02 | 6.8         | 175                    | 1141                   | 0.128        | 8.19E-03 | 9.3         | 1119                   |
| 180                    | 0.112        | 6.27E-03 | 1.1         | 175                    | 1142                   | 0.294        | 4.32E-02 | 49.5        | 1143                   |
| 196                    | -0.001       | 5.00E-07 | 0           | 193                    | 1171                   | -0.079       | 3.12E-03 | 3.7         | 1144                   |
| 220                    | -0.025       | 3.13E-04 | 0.1         | 216                    | 1171                   | -0.017       | 1.45E-04 | 0.2         | 1160                   |
| 220                    | 0.083        | 3.44E-03 | 0.8         | 217                    | 1173                   | 0.101        | 5.10E-03 | 6           | 1172                   |
| 237                    | 0.204        | 2.08E-02 | 4.9         | 232                    | 1187                   | -0.272       | 3.70E-02 | 44          | 1173                   |
| 237                    | 0.068        | 2.31E-03 | 0.6         | 234                    | 1187                   | 0.037        | 6.85E-04 | 0.8         | 1187                   |
| 268                    | 0.263        | 3.46E-02 | 9.3         | 259                    | 1187                   | 0.183        | 1.67E-02 | 19.8        | 1187                   |
| 287                    | 0.387        | 7.49E-02 | 21.5        | 270                    | 1197                   | -0.075       | 2.81E-03 | 3.4         | 1194                   |
| 320                    | -0.137       | 9.38E-03 | 3           | 283                    | 1197                   | 0.033        | 5.45E-04 | 0.6         | 1199                   |
| 320                    | 0.025        | 3.13E-04 | 0.1         | 308                    | 1202                   | 0.062        | 1.92E-03 | 2.3         | 1200                   |
| 332                    | 0.159        | 1.26E-02 | 4.2         | 318                    | 1275                   | 0.013        | 8.45E-05 | 0.1         | 1207                   |
| 332                    | -0.03        | 4.50E-04 | 0.2         | 331                    | 1275                   | -0.106       | 5.62E-03 | 7.1         | 1277                   |
| 338                    | -0.179       | 1.60E-02 | 5.4         | 335                    | 1280                   | -0.092       | 4.23E-03 | 5.4         | 1282                   |
| 402                    | 0.13         | 8.45E-03 | 3.4         | 373                    | 1344                   | 0.202        | 2.04E-02 | 27.6        | 1299                   |
| 402                    | 0.03         | 4.50E-04 | 0.2         | 400                    | 1344                   | -0.144       | 1.04E-02 | 13.9        | 1341                   |
| 411                    | 0.052        | 1.35E-03 | 0.6         | 401                    | 1345                   | 0.167        | 1.39E-02 | 18.7        | 1345                   |
| 471                    | -0.109       | 5.94E-03 | 2.8         | 411                    | 1346                   | 0.047        | 1.10E-03 | 1.5         | 1345                   |
| 471                    | 0.009        | 4.05E-05 | 0           | 457                    | 1346                   | -0.403       | 8.12E-02 | 109.2       | 1349                   |
| 479                    | -0.041       | 8.41E-04 | 0.4         | 469                    | 1347                   | -0.282       | 3.98E-02 | 53.6        | 1349                   |
| 511                    | -0.166       | 1.38E-02 | 7.1         | 477                    | 1384                   | -0.014       | 9.80E-05 | 0.1         | 1350                   |
| 513                    | -0.185       | 1.71E-02 | 8.8         | 496                    | 1384                   | -0.042       | 8.82E-04 | 1.2         | 1385                   |
| 513                    | -0.145       | 1.05E-02 | 5.4         | 498                    | 1386                   | 0.034        | 5.78E-04 | 0.8         | 1387                   |
| 547                    | 0.052        | 1.35E-03 | 0.7         | 511                    | 1402                   | -0.004       | 8.00E-06 | 0           | 1396                   |
| 547                    | 0.049        | 1.20E-03 | 0.7         | 512                    | 1402                   | 0.08         | 3.20E-03 | 4.5         | 1402                   |
| 547                    | -0.046       | 1.06E-03 | 0.6         | 519                    | 1403                   | -0.054       | 1.46E-03 | 2           | 1403                   |
| 576                    | -0.034       | 5.78E-04 | 0.3         | 546                    | 1486                   | -0.05        | 1.25E-03 | 1.8         | 1431                   |

|      |        |          |       |     |      |        |          |       |      |
|------|--------|----------|-------|-----|------|--------|----------|-------|------|
| 576  | 0.007  | 2.45E-05 | 0     | 547 | 1487 | -0.141 | 9.94E-03 | 14.7  | 1459 |
| 576  | 0.027  | 3.65E-04 | 0.2   | 581 | 1487 | -0.048 | 1.15E-03 | 1.7   | 1483 |
| 670  | 0.597  | 1.78E-01 | 119.5 | 587 | 1490 | -0.168 | 1.41E-02 | 21    | 1486 |
| 670  | -0.167 | 1.39E-02 | 9.4   | 614 | 1490 | -0.459 | 1.05E-01 | 156.7 | 1487 |
| 672  | 0.489  | 1.20E-01 | 80.2  | 633 | 1491 | 0.346  | 5.99E-02 | 89.2  | 1490 |
| 686  | -0.001 | 5.00E-07 | 0     | 637 | 1531 | -0.158 | 1.25E-02 | 19.1  | 1491 |
| 686  | 0.019  | 1.81E-04 | 0.1   | 668 | 1532 | 0.211  | 2.23E-02 | 34    | 1510 |
| 686  | -0.007 | 2.45E-05 | 0     | 670 | 1532 | -0.037 | 6.85E-04 | 1     | 1532 |
| 715  | -0.129 | 8.32E-03 | 6     | 673 | 1627 | -0.519 | 1.35E-01 | 219.3 | 1533 |
| 715  | 0.069  | 2.38E-03 | 1.7   | 686 | 1627 | 0.594  | 1.76E-01 | 286.7 | 1573 |
| 715  | 0.19   | 1.81E-02 | 12.9  | 687 | 1628 | -0.562 | 1.58E-01 | 256.6 | 1628 |
| 738  | -0.048 | 1.15E-03 | 0.8   | 689 | 1641 | -0.178 | 1.58E-02 | 26    | 1629 |
| 738  | 0.015  | 1.13E-04 | 0.1   | 716 | 1642 | -0.149 | 1.11E-02 | 18.2  | 1642 |
| 738  | -0.009 | 4.05E-05 | 0     | 717 | 1642 | -0.154 | 1.19E-02 | 19.4  | 1642 |
| 763  | -0.013 | 8.45E-05 | 0.1   | 729 | 1678 | -0.763 | 2.91E-01 | 487.9 | 1663 |
| 764  | -0.012 | 7.20E-05 | 0.1   | 737 | 1678 | -0.269 | 3.62E-02 | 60.5  | 1677 |
| 764  | -0.021 | 2.21E-04 | 0.2   | 738 | 1680 | 0.571  | 1.63E-01 | 273.6 | 1679 |
| 766  | -0.023 | 2.65E-04 | 0.2   | 748 | 3185 | -0.028 | 3.92E-04 | 1.2   | 3186 |
| 766  | -0.01  | 5.00E-05 | 0     | 764 | 3185 | 0.017  | 1.45E-04 | 0.4   | 3187 |
| 766  | 0.011  | 6.05E-05 | 0     | 765 | 3185 | -0.024 | 2.88E-04 | 0.9   | 3191 |
| 813  | -0.029 | 4.21E-04 | 0.3   | 767 | 3197 | -0.026 | 3.38E-04 | 1.1   | 3197 |
| 813  | 0.011  | 6.05E-05 | 0     | 768 | 3197 | 0.003  | 4.50E-06 | 0     | 3199 |
| 816  | 0.024  | 2.88E-04 | 0.2   | 813 | 3197 | -0.021 | 2.21E-04 | 0.7   | 3211 |
| 892  | 0.003  | 4.50E-06 | 0     | 815 | 3223 | -0.007 | 2.45E-05 | 0.1   | 3217 |
| 892  | 0.005  | 1.25E-05 | 0     | 893 | 3223 | -0.001 | 5.00E-07 | 0     | 3219 |
| 894  | -0.021 | 2.21E-04 | 0.2   | 895 | 3223 | 0.008  | 3.20E-05 | 0.1   | 3221 |
| 950  | 0.011  | 6.05E-05 | 0.1   | 921 | 3232 | 0.022  | 2.42E-04 | 0.7   | 3227 |
| 950  | -0.006 | 1.80E-05 | 0     | 931 | 3232 | -0.001 | 5.00E-07 | 0     | 3228 |
| 951  | -0.025 | 3.13E-04 | 0.3   | 952 | 3233 | 0.013  | 8.45E-05 | 0.3   | 3237 |
| 987  | -0.254 | 3.23E-02 | 31.8  | 953 | 3333 | -0.024 | 2.88E-04 | 0.9   | 3334 |
| 987  | -0.396 | 7.84E-02 | 77.3  | 960 | 3333 | 0.001  | 5.00E-07 | 0     | 3334 |
| 989  | 0.29   | 4.21E-02 | 41.6  | 963 | 3333 | -0.034 | 5.78E-04 | 1.9   | 3344 |
| 1002 | 0.033  | 5.45E-04 | 0.5   | 977 | 3718 | -0.006 | 1.80E-05 | 0.1   | 3714 |
| 1002 | -0.007 | 2.45E-05 | 0     | 987 | 3718 | -0.008 | 3.20E-05 | 0.1   | 3716 |
| 1004 | 0.01   | 5.00E-05 | 0.1   | 989 | 3718 | 0.003  | 4.50E-06 | 0     | 3722 |



**Table S9.** Vibrational frequencies ( $\text{cm}^{-1}$ ) at the respective optimized  $\text{S}_0$  and  $\text{T}_1$  states, dimensionless displacement  $\Delta Q_i$ , Huang-Rhys factors  $S_i$  and reorganization energy  $\lambda_i$  ( $\text{cm}^{-1}$ ) of 4.

| $\omega_i(\text{S}_0)$ | $\Delta Q_i$ | $S_i$    | $\lambda_i$ | $\omega_i(\text{T}_1)$ | $\omega_i(\text{S}_0)$ | $\Delta Q_i$ | $S_i$    | $\lambda_i$ | $\omega_i(\text{T}_1)$ |
|------------------------|--------------|----------|-------------|------------------------|------------------------|--------------|----------|-------------|------------------------|
| 33                     | -0.844       | 3.56E-01 | 11.6        | 30                     | 1009                   | -0.128       | 8.19E-03 | 8.3         | 1004                   |
| 33                     | 0.192        | 1.84E-02 | 0.6         | 33                     | 1009                   | 0.6          | 1.80E-01 | 181.3       | 1008                   |
| 35                     | 0.527        | 1.39E-01 | 4.8         | 35                     | 1013                   | -0.288       | 4.15E-02 | 41.9        | 1008                   |
| 45                     | -0.03        | 4.50E-04 | 0           | 44                     | 1061                   | 0.298        | 4.44E-02 | 47          | 1011                   |
| 45                     | 0.244        | 2.98E-02 | 1.3         | 46                     | 1061                   | -0.551       | 1.52E-01 | 161.2       | 1025                   |
| 53                     | 0.236        | 2.78E-02 | 1.5         | 54                     | 1065                   | 0.158        | 1.25E-02 | 13.3        | 1051                   |
| 98                     | 0.171        | 1.46E-02 | 1.4         | 80                     | 1068                   | -0.127       | 8.06E-03 | 8.6         | 1061                   |
| 98                     | -0.03        | 4.50E-04 | 0           | 98                     | 1068                   | -0.014       | 9.80E-05 | 0.1         | 1065                   |
| 101                    | 0.025        | 3.13E-04 | 0           | 100                    | 1069                   | 0.312        | 4.87E-02 | 52.2        | 1067                   |
| 162                    | 0.117        | 6.84E-03 | 1.1         | 146                    | 1104                   | -0.555       | 1.54E-01 | 170.2       | 1068                   |
| 162                    | -0.239       | 2.86E-02 | 4.6         | 159                    | 1104                   | 0.001        | 5.00E-07 | 0           | 1095                   |
| 166                    | 0.261        | 3.41E-02 | 5.7         | 163                    | 1112                   | -0.407       | 8.28E-02 | 92          | 1104                   |
| 172                    | 0.045        | 1.01E-03 | 0.2         | 166                    | 1141                   | -0.092       | 4.23E-03 | 4.8         | 1109                   |
| 184                    | 0.122        | 7.44E-03 | 1.4         | 177                    | 1142                   | -0.12        | 7.20E-03 | 8.2         | 1126                   |
| 184                    | -0.044       | 9.68E-04 | 0.2         | 181                    | 1142                   | 0.078        | 3.04E-03 | 3.5         | 1142                   |
| 193                    | 0.309        | 4.77E-02 | 9.2         | 185                    | 1169                   | 0.182        | 1.66E-02 | 19.3        | 1143                   |
| 217                    | -0.153       | 1.17E-02 | 2.5         | 208                    | 1169                   | 0.21         | 2.21E-02 | 25.7        | 1154                   |
| 217                    | 0.447        | 9.99E-02 | 21.7        | 214                    | 1170                   | -0.245       | 3.00E-02 | 35.1        | 1170                   |
| 240                    | -0.113       | 6.38E-03 | 1.5         | 233                    | 1187                   | 0.123        | 7.56E-03 | 9           | 1172                   |
| 240                    | 0.05         | 1.25E-03 | 0.3         | 238                    | 1187                   | -0.158       | 1.25E-02 | 14.8        | 1182                   |
| 275                    | -0.249       | 3.10E-02 | 8.5         | 258                    | 1187                   | -0.127       | 8.06E-03 | 9.6         | 1187                   |
| 285                    | 0.605        | 1.83E-01 | 52.2        | 270                    | 1200                   | -0.008       | 3.20E-05 | 0           | 1187                   |
| 312                    | -0.022       | 2.42E-04 | 0.1         | 278                    | 1200                   | -0.146       | 1.07E-02 | 12.7        | 1195                   |
| 312                    | 0.274        | 3.75E-02 | 11.7        | 310                    | 1201                   | -0.094       | 4.42E-03 | 5.3         | 1198                   |
| 322                    | 0.202        | 2.04E-02 | 6.6         | 312                    | 1283                   | -0.024       | 2.88E-04 | 0.4         | 1201                   |
| 325                    | -0.1         | 5.00E-03 | 1.6         | 321                    | 1283                   | 0.011        | 6.05E-05 | 0.1         | 1261                   |
| 325                    | 0.332        | 5.51E-02 | 17.9        | 321                    | 1285                   | -0.012       | 7.20E-05 | 0.1         | 1285                   |
| 416                    | -0.395       | 7.80E-02 | 32.5        | 410                    | 1348                   | -0.021       | 2.21E-04 | 0.3         | 1287                   |
| 416                    | 0.259        | 3.35E-02 | 14          | 415                    | 1348                   | -0.312       | 4.87E-02 | 65.6        | 1341                   |
| 425                    | -0.28        | 3.92E-02 | 16.7        | 418                    | 1349                   | -0.199       | 1.98E-02 | 26.8        | 1344                   |
| 470                    | -0.108       | 5.83E-03 | 2.8         | 428                    | 1365                   | 0.142        | 1.01E-02 | 13.7        | 1349                   |
| 470                    | 0.046        | 1.06E-03 | 0.5         | 471                    | 1365                   | -0.075       | 2.81E-03 | 3.8         | 1365                   |
| 475                    | 0.032        | 5.12E-04 | 0.2         | 473                    | 1365                   | 0.121        | 7.32E-03 | 10          | 1368                   |
| 533                    | 0.093        | 4.32E-03 | 2.3         | 479                    | 1386                   | -0.099       | 4.90E-03 | 6.9         | 1369                   |
| 534                    | -0.126       | 7.94E-03 | 4.2         | 527                    | 1387                   | -0.115       | 6.61E-03 | 9.1         | 1388                   |
| 534                    | 0.01         | 5.00E-05 | 0           | 532                    | 1387                   | -0.034       | 5.78E-04 | 0.8         | 1389                   |
| 556                    | 0.143        | 1.02E-02 | 5.7         | 536                    | 1446                   | 0.466        | 1.09E-01 | 157.3       | 1410                   |
| 556                    | -0.033       | 5.45E-04 | 0.3         | 555                    | 1446                   | -0.102       | 5.20E-03 | 7.5         | 1445                   |
| 557                    | 0.113        | 6.38E-03 | 3.5         | 556                    | 1447                   | -0.353       | 6.23E-02 | 90.1        | 1447                   |
| 670                    | 0.311        | 4.84E-02 | 32.5        | 561                    | 1491                   | -0.238       | 2.83E-02 | 42.3        | 1454                   |

|      |        |          |       |      |      |        |          |       |      |
|------|--------|----------|-------|------|------|--------|----------|-------|------|
| 670  | 0.235  | 2.76E-02 | 18.4  | 597  | 1491 | 0.582  | 1.69E-01 | 252.9 | 1473 |
| 671  | 0.279  | 3.89E-02 | 26.2  | 646  | 1492 | 0.349  | 6.09E-02 | 90.7  | 1490 |
| 673  | 0.046  | 1.06E-03 | 0.7   | 669  | 1499 | -0.328 | 5.38E-02 | 80.8  | 1492 |
| 673  | 0.031  | 4.81E-04 | 0.3   | 671  | 1499 | 0.14   | 9.80E-03 | 14.6  | 1498 |
| 674  | -0.14  | 9.80E-03 | 6.6   | 672  | 1501 | -0.38  | 7.22E-02 | 108.5 | 1499 |
| 717  | -0.169 | 1.43E-02 | 10.2  | 672  | 1506 | -0.81  | 3.28E-01 | 494   | 1501 |
| 718  | -0.107 | 5.72E-03 | 4.1   | 704  | 1506 | -0.107 | 5.72E-03 | 8.6   | 1504 |
| 718  | -0.14  | 9.80E-03 | 7     | 715  | 1506 | 0.565  | 1.60E-01 | 240.4 | 1508 |
| 728  | -0.048 | 1.15E-03 | 0.8   | 718  | 1539 | -0.165 | 1.36E-02 | 20.8  | 1514 |
| 728  | 0.049  | 1.20E-03 | 0.9   | 722  | 1543 | -0.045 | 1.01E-03 | 1.5   | 1540 |
| 729  | 0.032  | 5.12E-04 | 0.4   | 728  | 1543 | 0.24   | 2.88E-02 | 44.6  | 1543 |
| 764  | 0.017  | 1.45E-04 | 0.1   | 730  | 1639 | -0.599 | 1.79E-01 | 294   | 1596 |
| 764  | -0.007 | 2.45E-05 | 0     | 734  | 1639 | -0.039 | 7.61E-04 | 1.3   | 1641 |
| 764  | 0.006  | 1.80E-05 | 0     | 741  | 1640 | 0.419  | 8.78E-02 | 143.8 | 1641 |
| 781  | -0.006 | 1.80E-05 | 0     | 763  | 1671 | 0.102  | 5.20E-03 | 8.6   | 1651 |
| 781  | -0.005 | 1.25E-05 | 0     | 765  | 1671 | -0.176 | 1.55E-02 | 26    | 1672 |
| 783  | 0.013  | 8.45E-05 | 0.1   | 780  | 1674 | 0.139  | 9.66E-03 | 16.1  | 1674 |
| 821  | 0.002  | 2.00E-06 | 0     | 784  | 3207 | -0.015 | 1.13E-04 | 0.3   | 3206 |
| 821  | -0.028 | 3.92E-04 | 0.3   | 814  | 3207 | -0.015 | 1.13E-04 | 0.3   | 3207 |
| 824  | -0.041 | 8.41E-04 | 0.7   | 822  | 3207 | 0.015  | 1.13E-04 | 0.3   | 3215 |
| 882  | -0.002 | 2.00E-06 | 0     | 829  | 3227 | 0.003  | 4.50E-06 | 0     | 3224 |
| 882  | -0.012 | 7.20E-05 | 0.1   | 838  | 3227 | 0.011  | 6.05E-05 | 0.2   | 3224 |
| 883  | 0.02   | 2.00E-04 | 0.2   | 850  | 3227 | 0.008  | 3.20E-05 | 0.1   | 3228 |
| 896  | -0.005 | 1.25E-05 | 0     | 883  | 3233 | 0.001  | 5.00E-07 | 0     | 3231 |
| 896  | 0.002  | 2.00E-06 | 0     | 889  | 3233 | -0.007 | 2.45E-05 | 0.1   | 3232 |
| 899  | 0.021  | 2.21E-04 | 0.2   | 895  | 3233 | 0.006  | 1.80E-05 | 0.1   | 3241 |
| 967  | -0.014 | 9.80E-05 | 0.1   | 899  | 3245 | 0.022  | 2.42E-04 | 0.8   | 3246 |
| 967  | 0.005  | 1.25E-05 | 0     | 955  | 3245 | -0.007 | 2.45E-05 | 0.1   | 3246 |
| 968  | -0.025 | 3.13E-04 | 0.3   | 957  | 3246 | 0.017  | 1.45E-04 | 0.5   | 3263 |
| 980  | -0.335 | 5.61E-02 | 55    | 967  | 3312 | 0.006  | 1.80E-05 | 0.1   | 3296 |
| 980  | 0.593  | 1.76E-01 | 172.3 | 969  | 3312 | -0.002 | 2.00E-06 | 0     | 3312 |
| 980  | -0.474 | 1.12E-01 | 110   | 980  | 3312 | -0.004 | 8.00E-06 | 0     | 3312 |
| 1006 | 0.05   | 1.25E-03 | 1.3   | 981  | 3332 | 0.003  | 4.50E-06 | 0     | 3323 |
| 1006 | -0.023 | 2.65E-04 | 0.3   | 986  | 3332 | 0.004  | 8.00E-06 | 0     | 3332 |
| 1007 | 0.035  | 6.13E-04 | 0.6   | 1001 | 3332 | 0.001  | 5.00E-07 | 0     | 3332 |

**Table S10.** Cartesian coordinates of **1** at the **T<sub>1</sub>** optimized geometry.

| Center<br>Number | Atomic<br>Number | Atomic<br>Type | Coordinates (Angstroms) |           |           |
|------------------|------------------|----------------|-------------------------|-----------|-----------|
|                  |                  |                | X                       | Y         | Z         |
| 1                | 77               | 0              | -0.007344               | -0.019979 | -0.159707 |
| 2                | 7                | 0              | -0.177156               | 1.860944  | -1.260885 |
| 3                | 6                | 0              | -0.798349               | 2.479836  | -2.293051 |
| 4                | 7                | 0              | -0.458710               | 3.742628  | -2.435414 |
| 5                | 7                | 0              | 0.424986                | 3.922160  | -1.427253 |
| 6                | 6                | 0              | 0.599771                | 2.798716  | -0.713511 |
| 7                | 6                | 0              | 1.408765                | 2.486080  | 0.440938  |
| 8                | 6                | 0              | 2.260281                | 3.404831  | 1.064302  |
| 9                | 6                | 0              | 2.995403                | 3.013450  | 2.171760  |
| 10               | 6                | 0              | 2.868207                | 1.703793  | 2.640725  |
| 11               | 6                | 0              | 2.019475                | 0.793947  | 2.016750  |
| 12               | 6                | 0              | 1.256657                | 1.146961  | 0.892484  |
| 13               | 7                | 0              | 1.621692                | -0.734073 | -1.329730 |
| 14               | 6                | 0              | 2.404887                | -0.458622 | -2.379870 |
| 15               | 7                | 0              | 3.372330                | -1.338498 | -2.593166 |
| 16               | 7                | 0              | 3.185569                | -2.242196 | -1.598979 |
| 17               | 6                | 0              | 2.129807                | -1.891115 | -0.792729 |
| 18               | 6                | 0              | 1.561855                | -2.434061 | 0.347090  |
| 19               | 6                | 0              | 1.981835                | -3.637512 | 1.006580  |
| 20               | 6                | 0              | 1.290245                | -4.070078 | 2.102137  |
| 21               | 6                | 0              | 0.159743                | -3.355652 | 2.619354  |
| 22               | 6                | 0              | -0.256282               | -2.175857 | 1.999159  |
| 23               | 6                | 0              | 0.387987                | -1.654061 | 0.877768  |
| 24               | 7                | 0              | -1.537358               | -1.027932 | -1.308601 |
| 25               | 6                | 0              | -1.750028               | -1.811570 | -2.392992 |
| 26               | 7                | 0              | -3.010461               | -2.145359 | -2.562731 |
| 27               | 7                | 0              | -3.618420               | -1.535526 | -1.518188 |
| 28               | 6                | 0              | -2.742657               | -0.862888 | -0.755972 |
| 29               | 6                | 0              | -2.887199               | -0.068674 | 0.441663  |
| 30               | 6                | 0              | -4.113284               | 0.172336  | 1.070997  |
| 31               | 6                | 0              | -4.149839               | 0.951405  | 2.216710  |
| 32               | 6                | 0              | -2.956587               | 1.479169  | 2.715592  |
| 33               | 6                | 0              | -1.740268               | 1.234927  | 2.082886  |
| 34               | 6                | 0              | -1.653974               | 0.451029  | 0.922387  |
| 35               | 1                | 0              | 2.351027                | 4.422222  | 0.687648  |
| 36               | 1                | 0              | 3.659833                | 3.715405  | 2.666087  |
| 37               | 1                | 0              | 3.440987                | 1.389305  | 3.509856  |
| 38               | 1                | 0              | 1.932855                | -0.212865 | 2.414992  |
| 39               | 1                | 0              | 2.835170                | -4.200614 | 0.637459  |
| 40               | 1                | 0              | 1.605215                | -4.984192 | 2.600758  |
| 41               | 1                | 0              | -0.356530               | -3.734560 | 3.494894  |
| 42               | 1                | 0              | -1.103291               | -1.633378 | 2.409784  |
| 43               | 1                | 0              | -5.036123               | -0.245658 | 0.672146  |
| 44               | 1                | 0              | -5.092786               | 1.147132  | 2.717911  |
| 45               | 1                | 0              | -2.978158               | 2.089036  | 3.615719  |
| 46               | 1                | 0              | -0.831483               | 1.653918  | 2.505275  |
| 47               | 1                | 0              | -0.963365               | -2.136738 | -3.057572 |
| 48               | 1                | 0              | -4.612102               | -1.636015 | -1.392935 |
| 49               | 1                | 0              | -1.507004               | 1.990117  | -2.944393 |
| 50               | 1                | 0              | 0.849043                | 4.824844  | -1.291278 |
| 51               | 1                | 0              | 2.271050                | 0.406845  | -3.013363 |
| 52               | 1                | 0              | 3.825116                | -3.009806 | -1.497864 |

**Table S11.** Cartesian coordinates of **2** at the **T<sub>1</sub>** optimized geometry.

| Center<br>Number | Atomic<br>Number | Atomic<br>Type | Coordinates (Angstroms) |           |           |
|------------------|------------------|----------------|-------------------------|-----------|-----------|
|                  |                  |                | X                       | Y         | Z         |
| 1                | 77               | 0              | 0.009767                | 0.007888  | -0.153983 |
| 2                | 7                | 0              | -1.365327               | 1.071469  | -1.291581 |
| 3                | 7                | 0              | -2.525107               | 2.910692  | -1.632429 |
| 4                | 6                | 0              | -1.574482               | 2.344055  | -0.798980 |
| 5                | 6                | 0              | -0.911115               | 2.748000  | 0.334848  |
| 6                | 6                | 0              | -1.029647               | 4.029406  | 0.983146  |
| 7                | 6                | 0              | -0.261425               | 4.291510  | 2.080008  |
| 8                | 6                | 0              | 0.652167                | 3.325701  | 2.604871  |
| 9                | 6                | 0              | 0.769769                | 2.068863  | 1.994942  |
| 10               | 6                | 0              | 0.024709                | 1.710658  | 0.878400  |
| 11               | 7                | 0              | 1.724066                | 0.632771  | -1.284223 |
| 12               | 7                | 0              | 3.863753                | 0.625119  | -1.555847 |
| 13               | 6                | 0              | 2.853445                | 0.174385  | -0.770496 |
| 14               | 6                | 0              | 2.826909                | -0.638298 | 0.422310  |
| 15               | 6                | 0              | 3.968068                | -1.166931 | 1.032807  |
| 16               | 6                | 0              | 3.833985                | -1.936553 | 2.178813  |
| 17               | 6                | 0              | 2.556973                | -2.164577 | 2.695328  |
| 18               | 6                | 0              | 1.425594                | -1.634319 | 2.078953  |
| 19               | 6                | 0              | 1.511771                | -0.849244 | 0.919475  |
| 20               | 7                | 0              | -0.301332               | -1.836932 | -1.230669 |
| 21               | 7                | 0              | -1.438629               | -3.653346 | -1.480467 |
| 22               | 6                | 0              | -1.300619               | -2.536453 | -0.722097 |
| 23               | 6                | 0              | -1.991908               | -2.055269 | 0.450217  |
| 24               | 6                | 0              | -3.042690               | -2.733683 | 1.074151  |
| 25               | 6                | 0              | -3.628372               | -2.191292 | 2.208625  |
| 26               | 6                | 0              | -3.151544               | -0.975610 | 2.703314  |
| 27               | 6                | 0              | -2.105351               | -0.303860 | 2.075741  |
| 28               | 6                | 0              | -1.487082               | -0.813214 | 0.923945  |
| 29               | 1                | 0              | -1.722977               | 4.776382  | 0.603715  |
| 30               | 1                | 0              | -0.346792               | 5.258003  | 2.572122  |
| 31               | 1                | 0              | 1.241005                | 3.569444  | 3.483397  |
| 32               | 1                | 0              | 1.453484                | 1.339050  | 2.419825  |
| 33               | 1                | 0              | 4.958766                | -0.979867 | 0.620665  |
| 34               | 1                | 0              | 4.710279                | -2.352967 | 2.666501  |
| 35               | 1                | 0              | 2.444667                | -2.763153 | 3.596497  |
| 36               | 1                | 0              | 0.449114                | -1.824323 | 2.515887  |
| 37               | 1                | 0              | -3.404016               | -3.682634 | 0.680472  |
| 38               | 1                | 0              | -4.444349               | -2.707989 | 2.704976  |
| 39               | 1                | 0              | -3.604010               | -0.546943 | 3.594472  |
| 40               | 1                | 0              | -1.746604               | 0.633850  | 2.490834  |
| 41               | 1                | 0              | -2.117130               | -4.386191 | -1.357681 |
| 42               | 1                | 0              | -2.865343               | 3.854652  | -1.604765 |
| 43               | 1                | 0              | 4.846968                | 0.449681  | -1.433111 |
| 44               | 6                | 0              | -2.827474               | 1.948416  | -2.555624 |
| 45               | 7                | 0              | -2.149976               | 0.844723  | -2.353575 |
| 46               | 1                | 0              | -3.543661               | 2.089368  | -3.351613 |
| 47               | 7                | 0              | 1.971961                | 1.377333  | -2.387280 |
| 48               | 6                | 0              | 3.267661                | 1.363137  | -2.540819 |
| 49               | 1                | 0              | 3.811156                | 1.859712  | -3.330396 |
| 50               | 7                | 0              | 0.223645                | -2.472940 | -2.304121 |
| 51               | 6                | 0              | -0.474257               | -3.567138 | -2.445424 |
| 52               | 1                | 0              | -0.324502               | -4.311817 | -3.212483 |

**Table S12.** Cartesian coordinates of **3** at the **T<sub>1</sub>** optimized geometry.

| Center<br>Number | Atomic<br>Number | Atomic<br>Type | Coordinates (Angstroms) |           |           |
|------------------|------------------|----------------|-------------------------|-----------|-----------|
|                  |                  |                | X                       | Y         | Z         |
| 1                | 77               | 0              | -0.008437               | -0.020618 | -0.161466 |
| 2                | 7                | 0              | -0.479197               | 1.783000  | -1.233281 |
| 3                | 6                | 0              | 0.127255                | 2.891065  | -0.709868 |
| 4                | 6                | 0              | 0.973114                | 2.683241  | 0.451023  |
| 5                | 6                | 0              | 1.658281                | 3.723292  | 1.085441  |
| 6                | 6                | 0              | 2.445122                | 3.455903  | 2.196709  |
| 7                | 6                | 0              | 2.536637                | 2.143783  | 2.662276  |
| 8                | 6                | 0              | 1.851280                | 1.110264  | 2.027817  |
| 9                | 6                | 0              | 1.046809                | 1.338659  | 0.901508  |
| 10               | 7                | 0              | 1.723202                | -0.462229 | -1.307117 |
| 11               | 6                | 0              | 2.456419                | -1.529009 | -0.789421 |
| 12               | 6                | 0              | 1.956687                | -2.143901 | 0.352154  |
| 13               | 6                | 0              | 2.584023                | -3.262374 | 1.020005  |
| 14               | 6                | 0              | 1.981756                | -3.807367 | 2.107359  |
| 15               | 6                | 0              | 0.730910                | -3.294475 | 2.621746  |
| 16               | 6                | 0              | 0.114982                | -2.199417 | 1.998354  |
| 17               | 6                | 0              | 0.652580                | -1.574340 | 0.882923  |
| 18               | 7                | 0              | -1.360765               | -1.256187 | -1.274156 |
| 19               | 6                | 0              | -2.617200               | -1.300141 | -0.735098 |
| 20               | 6                | 0              | -2.837614               | -0.526188 | 0.473177  |
| 21               | 6                | 0              | -4.072041               | -0.478914 | 1.127161  |
| 22               | 6                | 0              | -4.212431               | 0.277763  | 2.281974  |
| 23               | 6                | 0              | -3.109824               | 0.979643  | 2.769884  |
| 24               | 6                | 0              | -1.881540               | 0.928416  | 2.113911  |
| 25               | 6                | 0              | -1.697317               | 0.177538  | 0.943606  |
| 26               | 1                | 0              | 1.574688                | 4.741633  | 0.710465  |
| 27               | 1                | 0              | 2.980052                | 4.258538  | 2.696172  |
| 28               | 1                | 0              | 3.148734                | 1.924054  | 3.534051  |
| 29               | 1                | 0              | 1.927699                | 0.100432  | 2.421369  |
| 30               | 1                | 0              | 3.526462                | -3.656352 | 0.648512  |
| 31               | 1                | 0              | 2.448692                | -4.650391 | 2.612416  |
| 32               | 1                | 0              | 0.286286                | -3.756782 | 3.496699  |
| 33               | 1                | 0              | -0.812539               | -1.814518 | 2.412201  |
| 34               | 1                | 0              | -4.921123               | -1.035962 | 0.735337  |
| 35               | 1                | 0              | -5.167333               | 0.319406  | 2.798035  |
| 36               | 1                | 0              | -3.208425               | 1.571730  | 3.676986  |
| 37               | 1                | 0              | -1.039995               | 1.477981  | 2.525847  |
| 38               | 7                | 0              | -1.216700               | 2.074180  | -2.257861 |
| 39               | 7                | 0              | 2.280687                | 0.045810  | -2.350106 |
| 40               | 7                | 0              | -1.269125               | -1.976163 | -2.347669 |
| 41               | 6                | 0              | -0.279038               | 3.950276  | -1.490870 |
| 42               | 1                | 0              | -0.067190               | 5.006733  | -1.464206 |
| 43               | 7                | 0              | -1.094662               | 3.386101  | -2.414520 |
| 44               | 7                | 0              | 3.384639                | -0.665086 | -2.561041 |
| 45               | 7                | 0              | -2.474894               | -2.500240 | -2.519742 |
| 46               | 6                | 0              | 3.568702                | -1.657405 | -1.647524 |
| 47               | 1                | 0              | 4.410269                | -2.328068 | -1.669165 |
| 48               | 6                | 0              | -3.353125               | -2.123317 | -1.558439 |
| 49               | 1                | 0              | -4.378036               | -2.456298 | -1.538890 |
| 50               | 1                | 0              | -2.629083               | -3.108604 | -3.307923 |
| 51               | 1                | 0              | -1.595100               | 3.831783  | -3.166686 |
| 52               | 1                | 0              | 3.966734                | -0.419988 | -3.344722 |

**Table S13.** Cartesian coordinates of **4** at the **T<sub>1</sub>** optimized geometry.

| Center Number | Atomic Number | Atomic Type | Coordinates (Angstroms) |           |           |
|---------------|---------------|-------------|-------------------------|-----------|-----------|
|               |               |             | X                       | Y         | Z         |
| 1             | 77            | 0           | -0.004799               | -0.013506 | -0.175035 |
| 2             | 7             | 0           | -1.307414               | -1.312074 | -1.293450 |
| 3             | 6             | 0           | -2.784449               | -0.673117 | 0.435294  |
| 4             | 6             | 0           | -4.037003               | -0.752463 | 1.033970  |
| 5             | 6             | 0           | -4.250012               | -0.023819 | 2.196865  |
| 6             | 6             | 0           | -3.216799               | 0.753299  | 2.720897  |
| 7             | 6             | 0           | -1.973226               | 0.807589  | 2.093321  |
| 8             | 6             | 0           | -1.706285               | 0.091423  | 0.918633  |
| 9             | 7             | 0           | -0.565052               | 1.760785  | -1.250656 |
| 10            | 6             | 0           | 0.819738                | 2.724274  | 0.393412  |
| 11            | 6             | 0           | 1.412266                | 3.846550  | 0.961031  |
| 12            | 6             | 0           | 2.222751                | 3.664751  | 2.073418  |
| 13            | 6             | 0           | 2.413674                | 2.379631  | 2.581113  |
| 14            | 6             | 0           | 1.802946                | 1.276943  | 1.987445  |
| 15            | 6             | 0           | 0.977639                | 1.407030  | 0.862101  |
| 16            | 7             | 0           | 1.722209                | -0.424789 | -1.343493 |
| 17            | 6             | 0           | 2.024271                | -2.036901 | 0.322186  |
| 18            | 6             | 0           | 2.747224                | -3.106013 | 0.943096  |
| 19            | 6             | 0           | 2.208355                | -3.667859 | 2.061044  |
| 20            | 6             | 0           | 0.965724                | -3.206887 | 2.606600  |
| 21            | 6             | 0           | 0.271537                | -2.159799 | 2.006007  |
| 22            | 6             | 0           | 0.742372                | -1.520643 | 0.857444  |
| 23            | 1             | 0           | -4.811401               | -1.372388 | 0.594249  |
| 24            | 1             | 0           | -5.215960               | -0.063770 | 2.690804  |
| 25            | 1             | 0           | -3.382155               | 1.322910  | 3.631787  |
| 26            | 1             | 0           | -1.184279               | 1.414370  | 2.528219  |
| 27            | 1             | 0           | 1.233259                | 4.827644  | 0.533662  |
| 28            | 1             | 0           | 2.700795                | 4.520045  | 2.540680  |
| 29            | 1             | 0           | 3.046690                | 2.234496  | 3.452616  |
| 30            | 1             | 0           | 1.961148                | 0.289674  | 2.411586  |
| 31            | 1             | 0           | 3.685919                | -3.429602 | 0.509509  |
| 32            | 1             | 0           | 2.730710                | -4.483073 | 2.554623  |
| 33            | 1             | 0           | 0.572870                | -3.681201 | 3.500343  |
| 34            | 1             | 0           | -0.659117               | -1.815052 | 2.445754  |
| 35            | 7             | 0           | -0.019973               | 2.857885  | -0.737719 |
| 36            | 7             | 0           | -0.342106               | 3.966354  | -1.361269 |
| 37            | 6             | 0           | -1.153228               | 3.567134  | -2.344928 |
| 38            | 6             | 0           | -1.299729               | 2.181349  | -2.281833 |
| 39            | 1             | 0           | -1.584590               | 4.278134  | -3.033106 |
| 40            | 1             | 0           | -1.866814               | 1.490389  | -2.885542 |
| 41            | 6             | 0           | 3.630402                | -0.797966 | -2.420297 |
| 42            | 6             | 0           | 2.484617                | -0.005520 | -2.372780 |
| 43            | 7             | 0           | 3.639018                | -1.711370 | -1.441108 |
| 44            | 7             | 0           | 2.467736                | -1.448030 | -0.782608 |
| 45            | 1             | 0           | 4.448931                | -0.747796 | -3.124217 |
| 46            | 1             | 0           | 2.172245                | 0.813176  | -3.002349 |
| 47            | 7             | 0           | -2.517568               | -1.402332 | -0.751176 |
| 48            | 7             | 0           | -3.346467               | -2.179749 | -1.405959 |
| 49            | 6             | 0           | -2.630723               | -2.628039 | -2.442392 |
| 50            | 6             | 0           | -1.346818               | -2.086837 | -2.378973 |
| 51            | 1             | 0           | -3.062572               | -3.304702 | -3.164167 |
| 52            | 1             | 0           | -0.480330               | -2.204713 | -3.010767 |

**Table S14.** Cartesian coordinates of **1** at the <sup>3</sup>MC optimized geometry.

| Center<br>Number | Atomic<br>Number | Atomic<br>Type | Coordinates (Angstroms) |           |           |
|------------------|------------------|----------------|-------------------------|-----------|-----------|
|                  |                  |                | X                       | Y         | Z         |
| 1                | 77               | 0              | -0.349163               | 0.083578  | 0.016766  |
| 2                | 7                | 0              | 3.005588                | -0.168927 | -0.607193 |
| 3                | 6                | 0              | 3.907207                | -0.619423 | -1.513837 |
| 4                | 7                | 0              | 4.367350                | -1.839149 | -1.301920 |
| 5                | 7                | 0              | 3.706975                | -2.180794 | -0.180761 |
| 6                | 6                | 0              | 2.890763                | -1.183403 | 0.237731  |
| 7                | 6                | 0              | 2.072262                | -1.290866 | 1.449457  |
| 8                | 6                | 0              | 2.645111                | -1.942330 | 2.554958  |
| 9                | 6                | 0              | 1.933467                | -2.124986 | 3.730681  |
| 10               | 6                | 0              | 0.630043                | -1.642269 | 3.808868  |
| 11               | 6                | 0              | 0.065220                | -0.980391 | 2.722537  |
| 12               | 6                | 0              | 0.756690                | -0.787234 | 1.514916  |
| 13               | 7                | 0              | -0.841629               | -1.860392 | -0.805078 |
| 14               | 6                | 0              | -0.288359               | -3.007998 | -1.265149 |
| 15               | 7                | 0              | -1.172544               | -3.913644 | -1.625708 |
| 16               | 7                | 0              | -2.346796               | -3.294296 | -1.371224 |
| 17               | 6                | 0              | -2.158959               | -2.060769 | -0.877599 |
| 18               | 6                | 0              | -3.067392               | -1.019086 | -0.451834 |
| 19               | 6                | 0              | -4.458913               | -1.134694 | -0.471311 |
| 20               | 6                | 0              | -5.237196               | -0.068210 | -0.040330 |
| 21               | 6                | 0              | -4.617014               | 1.099681  | 0.408444  |
| 22               | 6                | 0              | -3.228628               | 1.207905  | 0.430547  |
| 23               | 6                | 0              | -2.406006               | 0.156837  | -0.001955 |
| 24               | 7                | 0              | 0.501158                | 0.984598  | -1.743058 |
| 25               | 6                | 0              | 0.908333                | 0.731782  | -3.011047 |
| 26               | 7                | 0              | 1.519616                | 1.746553  | -3.577803 |
| 27               | 7                | 0              | 1.495280                | 2.687258  | -2.602605 |
| 28               | 6                | 0              | 0.890555                | 2.240054  | -1.493843 |
| 29               | 6                | 0              | 0.632641                | 2.834793  | -0.205639 |
| 30               | 6                | 0              | 0.949899                | 4.154750  | 0.128550  |
| 31               | 6                | 0              | 0.654653                | 4.627704  | 1.397912  |
| 32               | 6                | 0              | 0.047209                | 3.770349  | 2.318720  |
| 33               | 6                | 0              | -0.265005               | 2.456869  | 1.979246  |
| 34               | 6                | 0              | 0.012405                | 1.937431  | 0.705632  |
| 35               | 1                | 0              | 3.678580                | -2.278323 | 2.496991  |
| 36               | 1                | 0              | 2.393263                | -2.624743 | 4.578009  |
| 37               | 1                | 0              | 0.051715                | -1.772857 | 4.720014  |
| 38               | 1                | 0              | -0.956670               | -0.615980 | 2.810015  |
| 39               | 1                | 0              | -4.940054               | -2.047445 | -0.818161 |
| 40               | 1                | 0              | -6.320221               | -0.144933 | -0.051995 |
| 41               | 1                | 0              | -5.227338               | 1.935178  | 0.742345  |
| 42               | 1                | 0              | -2.771286               | 2.126480  | 0.786588  |
| 43               | 1                | 0              | 1.422945                | 4.813961  | -0.597190 |
| 44               | 1                | 0              | 0.894951                | 5.650280  | 1.672018  |
| 45               | 1                | 0              | -0.181739               | 4.134516  | 3.317359  |
| 46               | 1                | 0              | -0.725890               | 1.815554  | 2.725944  |
| 47               | 1                | 0              | 0.750776                | -0.210677 | -3.513581 |
| 48               | 1                | 0              | 1.920613                | 3.584557  | -2.766539 |
| 49               | 1                | 0              | 4.237901                | -0.030369 | -2.358788 |
| 50               | 1                | 0              | 3.834421                | -3.093478 | 0.226336  |
| 51               | 1                | 0              | 0.777285                | -3.171275 | -1.330426 |
| 52               | 1                | 0              | -3.212637               | -3.773373 | -1.556399 |

**Table S15.** Cartesian coordinates of **2** at the <sup>3</sup>MC optimized geometry.

| Center Number | Atomic Number | Atomic Type | Coordinates (Angstroms) |           |           |
|---------------|---------------|-------------|-------------------------|-----------|-----------|
|               |               |             | X                       | Y         | Z         |
| 1             | 77            | 0           | -0.488304               | 0.091270  | -0.129397 |
| 2             | 7             | 0           | -2.107602               | -0.985526 | -1.022532 |
| 3             | 7             | 0           | -4.228004               | -1.245932 | -1.345791 |
| 4             | 6             | 0           | -3.295672               | -0.496369 | -0.705649 |
| 5             | 6             | 0           | -3.376936               | 0.643485  | 0.174225  |
| 6             | 6             | 0           | -4.572819               | 1.221560  | 0.604941  |
| 7             | 6             | 0           | -4.534797               | 2.329503  | 1.440749  |
| 8             | 6             | 0           | -3.299068               | 2.848175  | 1.835344  |
| 9             | 6             | 0           | -2.109395               | 2.265967  | 1.408101  |
| 10            | 6             | 0           | -2.099413               | 1.140780  | 0.567417  |
| 11            | 7             | 0           | 0.549129                | 0.595937  | -1.869774 |
| 12            | 7             | 0           | 2.382605                | 1.313818  | -2.757023 |
| 13            | 6             | 0           | 1.661900                | 1.278757  | -1.613921 |
| 14            | 6             | 0           | 1.910838                | 1.748366  | -0.273956 |
| 15            | 6             | 0           | 2.978752                | 2.567066  | 0.102614  |
| 16            | 6             | 0           | 3.140168                | 2.905946  | 1.439610  |
| 17            | 6             | 0           | 2.236952                | 2.408833  | 2.383230  |
| 18            | 6             | 0           | 1.172106                | 1.595820  | 1.998820  |
| 19            | 6             | 0           | 0.957886                | 1.245691  | 0.656041  |
| 20            | 7             | 0           | 2.919988                | -1.204623 | -0.966034 |
| 21            | 7             | 0           | 3.742061                | -0.897344 | 1.033663  |
| 22            | 6             | 0           | 2.677803                | -1.370591 | 0.315920  |
| 23            | 6             | 0           | 1.534367                | -2.028739 | 0.972261  |
| 24            | 6             | 0           | 1.846800                | -3.132216 | 1.780351  |
| 25            | 6             | 0           | 0.858888                | -3.832393 | 2.459095  |
| 26            | 6             | 0           | -0.465987               | -3.432009 | 2.316053  |
| 27            | 6             | 0           | -0.781896               | -2.347712 | 1.503958  |
| 28            | 6             | 0           | 0.195984                | -1.598216 | 0.824447  |
| 29            | 1             | 0           | -5.533106               | 0.814106  | 0.292646  |
| 30            | 1             | 0           | -5.458199               | 2.788371  | 1.781090  |
| 31            | 1             | 0           | -3.267337               | 3.722109  | 2.481403  |
| 32            | 1             | 0           | -1.165376               | 2.697467  | 1.726340  |
| 33            | 1             | 0           | 3.678088                | 2.941290  | -0.642397 |
| 34            | 1             | 0           | 3.959739                | 3.548883  | 1.746842  |
| 35            | 1             | 0           | 2.364959                | 2.664976  | 3.432740  |
| 36            | 1             | 0           | 0.490603                | 1.218283  | 2.757650  |
| 37            | 1             | 0           | 2.883576                | -3.454087 | 1.853854  |
| 38            | 1             | 0           | 1.119084                | -4.685730 | 3.078610  |
| 39            | 1             | 0           | -1.258550               | -3.969112 | 2.831316  |
| 40            | 1             | 0           | -1.825463               | -2.057877 | 1.409872  |
| 41            | 1             | 0           | 3.776603                | -0.797130 | 2.035232  |
| 42            | 1             | 0           | -5.226422               | -1.121916 | -1.320610 |
| 43            | 1             | 0           | 3.370372                | 1.509599  | -2.805258 |
| 44            | 6             | 0           | -3.524517               | -2.187323 | -2.046363 |
| 45            | 7             | 0           | -2.241469               | -2.042777 | -1.858194 |
| 46            | 1             | 0           | -3.985286               | -2.941776 | -2.665975 |
| 47            | 7             | 0           | 0.537498                | 0.173520  | -3.159814 |
| 48            | 6             | 0           | 1.659755                | 0.593171  | -3.669290 |
| 49            | 1             | 0           | 1.985657                | 0.421768  | -4.684110 |
| 50            | 7             | 0           | 4.138539                | -0.587106 | -1.090422 |
| 51            | 6             | 0           | 4.610108                | -0.405865 | 0.115757  |
| 52            | 1             | 0           | 5.550410                | 0.063132  | 0.367278  |



**Table S16.** Cartesian coordinates of **3** at the <sup>3</sup>MC optimized geometry.

| Center Number | Atomic Number | Atomic Type | Coordinates (Angstroms) |           |           |
|---------------|---------------|-------------|-------------------------|-----------|-----------|
|               |               |             | X                       | Y         | Z         |
| 1             | 77            | 0           | -0.341714               | -0.124383 | 0.057421  |
| 2             | 7             | 0           | 3.047302                | 0.320836  | 0.180064  |
| 3             | 6             | 0           | 2.712240                | 1.442243  | -0.522414 |
| 4             | 6             | 0           | 1.748081                | 1.470399  | -1.631455 |
| 5             | 6             | 0           | 2.116781                | 2.179347  | -2.785272 |
| 6             | 6             | 0           | 1.265369                | 2.281821  | -3.876550 |
| 7             | 6             | 0           | 0.024201                | 1.655142  | -3.823434 |
| 8             | 6             | 0           | -0.344827               | 0.940270  | -2.686828 |
| 9             | 6             | 0           | 0.491847                | 0.835703  | -1.564297 |
| 10            | 7             | 0           | -0.960917               | 1.763626  | 0.877720  |
| 11            | 6             | 0           | -2.317527               | 1.898105  | 0.997787  |
| 12            | 6             | 0           | -3.118166               | 0.757374  | 0.593743  |
| 13            | 6             | 0           | -4.512909               | 0.746344  | 0.639088  |
| 14            | 6             | 0           | -5.206712               | -0.390705 | 0.242159  |
| 15            | 6             | 0           | -4.499481               | -1.510405 | -0.198311 |
| 16            | 6             | 0           | -3.108013               | -1.497058 | -0.246982 |
| 17            | 6             | 0           | -2.372395               | -0.366747 | 0.144583  |
| 18            | 7             | 0           | 0.803456                | -0.853244 | 1.670250  |
| 19            | 6             | 0           | 1.311385                | -2.108672 | 1.454816  |
| 20            | 6             | 0           | 0.950324                | -2.746268 | 0.204986  |
| 21            | 6             | 0           | 1.357294                | -4.034112 | -0.149768 |
| 22            | 6             | 0           | 0.969956                | -4.568521 | -1.371254 |
| 23            | 6             | 0           | 0.180220                | -3.802934 | -2.230025 |
| 24            | 6             | 0           | -0.223178               | -2.518954 | -1.871462 |
| 25            | 6             | 0           | 0.140107                | -1.947113 | -0.643763 |
| 26            | 1             | 0           | 3.103077                | 2.637071  | -2.824491 |
| 27            | 1             | 0           | 1.572458                | 2.832401  | -4.761279 |
| 28            | 1             | 0           | -0.658646               | 1.716056  | -4.667406 |
| 29            | 1             | 0           | -1.323720               | 0.465296  | -2.663184 |
| 30            | 1             | 0           | -5.058867               | 1.622570  | 0.982958  |
| 31            | 1             | 0           | -6.292313               | -0.405154 | 0.276078  |
| 32            | 1             | 0           | -5.040604               | -2.402629 | -0.504026 |
| 33            | 1             | 0           | -2.578005               | -2.379430 | -0.593480 |
| 34            | 1             | 0           | 1.976837                | -4.618217 | 0.527783  |
| 35            | 1             | 0           | 1.282565                | -5.569192 | -1.654978 |
| 36            | 1             | 0           | -0.120446               | -4.211610 | -3.191911 |
| 37            | 1             | 0           | -0.828384               | -1.943159 | -2.567139 |
| 38            | 7             | 0           | 3.940699                | 0.609727  | 1.072913  |
| 39            | 7             | 0           | -0.338809               | 2.831735  | 1.266589  |
| 40            | 7             | 0           | 1.192803                | -0.358300 | 2.808778  |
| 41            | 6             | 0           | 3.464598                | 2.484679  | -0.021602 |
| 42            | 1             | 0           | 3.505579                | 3.534923  | -0.262598 |
| 43            | 7             | 0           | 4.200383                | 1.917256  | 0.956633  |
| 44            | 7             | 0           | -1.291530               | 3.674243  | 1.647918  |
| 45            | 7             | 0           | 1.959868                | -1.296750 | 3.343609  |
| 46            | 6             | 0           | -2.536135               | 3.158481  | 1.504991  |
| 47            | 1             | 0           | -3.429898               | 3.703064  | 1.763026  |
| 48            | 6             | 0           | 2.075222                | -2.397162 | 2.560642  |
| 49            | 1             | 0           | 2.673482                | -3.250140 | 2.836351  |
| 50            | 1             | 0           | 2.396513                | -1.114080 | 4.232849  |
| 51            | 1             | 0           | 4.874143                | 2.345479  | 1.570735  |
| 52            | 1             | 0           | -1.024253               | 4.582770  | 1.991690  |

**Table S17.** Cartesian coordinates of **4** at the <sup>3</sup>MC optimized geometry.

| Center<br>Number | Atomic<br>Number | Atomic<br>Type | Coordinates (Angstroms) |           |           |
|------------------|------------------|----------------|-------------------------|-----------|-----------|
|                  |                  |                | X                       | Y         | Z         |
| 1                | 77               | 0              | -0.325362               | 0.094879  | -0.015387 |
| 2                | 7                | 0              | 3.899674                | -1.460561 | 0.130278  |
| 3                | 6                | 0              | 1.815891                | -1.765536 | 1.282188  |
| 4                | 6                | 0              | 2.360779                | -2.508636 | 2.330627  |
| 5                | 6                | 0              | 1.659581                | -2.644349 | 3.519152  |
| 6                | 6                | 0              | 0.409736                | -2.043145 | 3.642250  |
| 7                | 6                | 0              | -0.112906               | -1.295000 | 2.591041  |
| 8                | 6                | 0              | 0.579024                | -1.118188 | 1.381942  |
| 9                | 7                | 0              | -1.336384               | -1.578701 | -0.882216 |
| 10               | 6                | 0              | -3.217343               | -0.301670 | -0.288718 |
| 11               | 6                | 0              | -4.593148               | -0.137280 | -0.206877 |
| 12               | 6                | 0              | -5.076641               | 1.036678  | 0.361423  |
| 13               | 6                | 0              | -4.188444               | 2.005527  | 0.831286  |
| 14               | 6                | 0              | -2.812561               | 1.811735  | 0.738445  |
| 15               | 6                | 0              | -2.277692               | 0.645496  | 0.169910  |
| 16               | 7                | 0              | 0.669848                | 0.876482  | -1.718411 |
| 17               | 6                | 0              | 1.269419                | 2.529377  | -0.155305 |
| 18               | 6                | 0              | 1.925847                | 3.710510  | 0.171650  |
| 19               | 6                | 0              | 1.851204                | 4.153491  | 1.485306  |
| 20               | 6                | 0              | 1.135564                | 3.410524  | 2.426399  |
| 21               | 6                | 0              | 0.491141                | 2.230449  | 2.063977  |
| 22               | 6                | 0              | 0.529267                | 1.744809  | 0.749101  |
| 23               | 1                | 0              | 3.334959                | -2.967458 | 2.195362  |
| 24               | 1                | 0              | 2.080384                | -3.222681 | 4.335883  |
| 25               | 1                | 0              | -0.159983               | -2.148460 | 4.561686  |
| 26               | 1                | 0              | -1.084302               | -0.821288 | 2.716391  |
| 27               | 1                | 0              | -5.256744               | -0.911104 | -0.578501 |
| 28               | 1                | 0              | -6.148326               | 1.193260  | 0.438083  |
| 29               | 1                | 0              | -4.574543               | 2.921042  | 1.271190  |
| 30               | 1                | 0              | -2.135944               | 2.575821  | 1.108940  |
| 31               | 1                | 0              | 2.473480                | 4.256488  | -0.589444 |
| 32               | 1                | 0              | 2.352345                | 5.071788  | 1.775110  |
| 33               | 1                | 0              | 1.084975                | 3.754936  | 3.455951  |
| 34               | 1                | 0              | -0.047501               | 1.663556  | 2.818620  |
| 35               | 7                | 0              | -2.661807               | -1.470009 | -0.851771 |
| 36               | 7                | 0              | -3.304116               | -2.499906 | -1.354733 |
| 37               | 6                | 0              | -2.332890               | -3.332412 | -1.736911 |
| 38               | 6                | 0              | -1.090737               | -2.762647 | -1.441425 |
| 39               | 1                | 0              | -2.565858               | -4.283208 | -2.192082 |
| 40               | 1                | 0              | -0.072239               | -3.096909 | -1.569797 |
| 41               | 6                | 0              | 1.594395                | 1.713421  | -3.522261 |
| 42               | 6                | 0              | 0.841517                | 0.652855  | -3.028555 |
| 43               | 7                | 0              | 1.870926                | 2.563143  | -2.524961 |
| 44               | 7                | 0              | 1.301628                | 2.025773  | -1.473305 |
| 45               | 1                | 0              | 1.943741                | 1.905859  | -4.525444 |
| 46               | 1                | 0              | 0.428859                | -0.222892 | -3.502973 |
| 47               | 7                | 0              | 2.597370                | -1.686639 | 0.090396  |
| 48               | 7                | 0              | 2.094685                | -1.913278 | -1.114963 |
| 49               | 6                | 0              | 3.149463                | -1.811529 | -1.922675 |
| 50               | 6                | 0              | 4.276140                | -1.531739 | -1.144577 |
| 51               | 1                | 0              | 3.051063                | -1.946272 | -2.989862 |
| 52               | 1                | 0              | 5.306127                | -1.378775 | -1.430888 |

**Table S18.** Cartesian coordinates of **1** at the <sup>3</sup>TS optimized geometry.

| Center<br>Number | Atomic<br>Number | Atomic<br>Type | Coordinates (Angstroms) |           |           |
|------------------|------------------|----------------|-------------------------|-----------|-----------|
|                  |                  |                | X                       | Y         | Z         |
| 1                | 77               | 0              | -0.306271               | -0.000282 | 0.029231  |
| 2                | 7                | 0              | 2.711120                | 0.211746  | -0.949672 |
| 3                | 6                | 0              | 3.758148                | 0.113807  | -1.803245 |
| 4                | 7                | 0              | 4.844716                | -0.443365 | -1.302597 |
| 5                | 7                | 0              | 4.453179                | -0.710224 | -0.042971 |
| 6                | 6                | 0              | 3.175025                | -0.316498 | 0.175513  |
| 7                | 6                | 0              | 2.465443                | -0.487345 | 1.442287  |
| 8                | 6                | 0              | 3.220284                | -0.790765 | 2.589164  |
| 9                | 6                | 0              | 2.615751                | -1.035819 | 3.810433  |
| 10               | 6                | 0              | 1.227085                | -0.974083 | 3.896161  |
| 11               | 6                | 0              | 0.477848                | -0.637751 | 2.774228  |
| 12               | 6                | 0              | 1.059696                | -0.374913 | 1.520998  |
| 13               | 7                | 0              | -0.066585               | -1.991097 | -0.770067 |
| 14               | 6                | 0              | 0.857293                | -2.841034 | -1.279135 |
| 15               | 7                | 0              | 0.365303                | -4.015582 | -1.612355 |
| 16               | 7                | 0              | -0.941478               | -3.889460 | -1.289868 |
| 17               | 6                | 0              | -1.211237               | -2.676247 | -0.784331 |
| 18               | 6                | 0              | -2.427439               | -2.052230 | -0.309890 |
| 19               | 6                | 0              | -3.667736               | -2.691339 | -0.256792 |
| 20               | 6                | 0              | -4.773521               | -1.994515 | 0.213584  |
| 21               | 6                | 0              | -4.627427               | -0.669497 | 0.628822  |
| 22               | 6                | 0              | -3.386441               | -0.038680 | 0.577907  |
| 23               | 6                | 0              | -2.245977               | -0.703629 | 0.103727  |
| 24               | 7                | 0              | -0.024425               | 1.104473  | -1.803977 |
| 25               | 6                | 0              | 0.321712                | 0.978025  | -3.107932 |
| 26               | 7                | 0              | 0.370473                | 2.122484  | -3.750920 |
| 27               | 7                | 0              | 0.039607                | 3.016592  | -2.788055 |
| 28               | 6                | 0              | -0.197677               | 2.415282  | -1.612219 |
| 29               | 6                | 0              | -0.561757               | 2.908198  | -0.306943 |
| 30               | 6                | 0              | -0.795386               | 4.256986  | -0.020186 |
| 31               | 6                | 0              | -1.150321               | 4.631639  | 1.265969  |
| 32               | 6                | 0              | -1.265558               | 3.646582  | 2.249902  |
| 33               | 6                | 0              | -1.030454               | 2.306463  | 1.957017  |
| 34               | 6                | 0              | -0.668749               | 1.877781  | 0.669453  |
| 35               | 1                | 0              | 4.306884                | -0.810604 | 2.534628  |
| 36               | 1                | 0              | 3.218331                | -1.267001 | 4.683558  |
| 37               | 1                | 0              | 0.726417                | -1.174018 | 4.840023  |
| 38               | 1                | 0              | -0.605145               | -0.593282 | 2.870292  |
| 39               | 1                | 0              | -3.779023               | -3.726032 | -0.576213 |
| 40               | 1                | 0              | -5.743703               | -2.480099 | 0.258645  |
| 41               | 1                | 0              | -5.494457               | -0.124544 | 0.994023  |
| 42               | 1                | 0              | -3.298416               | 0.991851  | 0.910198  |
| 43               | 1                | 0              | -0.704073               | 5.013533  | -0.797705 |
| 44               | 1                | 0              | -1.335140               | 5.674603  | 1.503820  |
| 45               | 1                | 0              | -1.541544               | 3.932004  | 3.262239  |
| 46               | 1                | 0              | -1.122079               | 1.575625  | 2.755049  |
| 47               | 1                | 0              | 0.539402                | 0.031377  | -3.578827 |
| 48               | 1                | 0              | 0.006884                | 3.997630  | -3.010240 |
| 49               | 1                | 0              | 3.722579                | 0.468117  | -2.824857 |
| 50               | 1                | 0              | 5.082604                | -1.187147 | 0.580944  |
| 51               | 1                | 0              | 1.897714                | -2.580941 | -1.404460 |
| 52               | 1                | 0              | -1.569347               | -4.660795 | -1.445498 |

**Table S19.** Cartesian coordinates of **2** at the <sup>3</sup>TS optimized geometry.

| Center Number | Atomic Number | Atomic Type | Coordinates (Angstroms) |           |           |
|---------------|---------------|-------------|-------------------------|-----------|-----------|
|               |               |             | X                       | Y         | Z         |
| 1             | 77            | 0           | -0.358278               | -0.063980 | 0.047633  |
| 2             | 7             | 0           | -1.698133               | 1.087618  | 1.269421  |
| 3             | 7             | 0           | -3.708899               | 1.589270  | 1.881073  |
| 4             | 6             | 0           | -2.972750               | 0.818970  | 1.041148  |
| 5             | 6             | 0           | -3.327761               | -0.152991 | 0.032680  |
| 6             | 6             | 0           | -4.638611               | -0.483770 | -0.316508 |
| 7             | 6             | 0           | -4.861077               | -1.433692 | -1.305556 |
| 8             | 6             | 0           | -3.771924               | -2.037353 | -1.937161 |
| 9             | 6             | 0           | -2.466519               | -1.699021 | -1.587539 |
| 10            | 6             | 0           | -2.196620               | -0.750725 | -0.589796 |
| 11            | 7             | 0           | 0.430242                | -1.304448 | 1.567020  |
| 12            | 7             | 0           | 1.812825                | -2.857268 | 2.136642  |
| 13            | 6             | 0           | 1.295489                | -2.187241 | 1.079937  |
| 14            | 6             | 0           | 1.521051                | -2.264886 | -0.340186 |
| 15            | 6             | 0           | 2.359809                | -3.191040 | -0.964435 |
| 16            | 6             | 0           | 2.503306                | -3.160850 | -2.344632 |
| 17            | 6             | 0           | 1.806294                | -2.200377 | -3.081713 |
| 18            | 6             | 0           | 0.970766                | -1.279973 | -2.452523 |
| 19            | 6             | 0           | 0.792970                | -1.278961 | -1.061455 |
| 20            | 7             | 0           | 2.651789                | 0.477908  | 0.846687  |
| 21            | 7             | 0           | 4.019618                | 2.083761  | 0.311196  |
| 22            | 6             | 0           | 2.758440                | 1.577046  | 0.133703  |
| 23            | 6             | 0           | 1.727998                | 2.185802  | -0.705626 |
| 24            | 6             | 0           | 2.057318                | 3.334253  | -1.444879 |
| 25            | 6             | 0           | 1.124942                | 3.986113  | -2.235837 |
| 26            | 6             | 0           | -0.174890               | 3.491556  | -2.287136 |
| 27            | 6             | 0           | -0.510712               | 2.356181  | -1.557320 |
| 28            | 6             | 0           | 0.418075                | 1.655885  | -0.766514 |
| 29            | 1             | 0           | -5.486412               | -0.007718 | 0.173966  |
| 30            | 1             | 0           | -5.875812               | -1.701446 | -1.584910 |
| 31            | 1             | 0           | -3.946984               | -2.782151 | -2.709802 |
| 32            | 1             | 0           | -1.636488               | -2.180996 | -2.096269 |
| 33            | 1             | 0           | 2.900069                | -3.935111 | -0.381129 |
| 34            | 1             | 0           | 3.151364                | -3.875001 | -2.843770 |
| 35            | 1             | 0           | 1.920068                | -2.170220 | -4.162939 |
| 36            | 1             | 0           | 0.448393                | -0.538154 | -3.052102 |
| 37            | 1             | 0           | 3.069290                | 3.733843  | -1.417062 |
| 38            | 1             | 0           | 1.408726                | 4.869467  | -2.800231 |
| 39            | 1             | 0           | -0.928745               | 3.989266  | -2.892017 |
| 40            | 1             | 0           | -1.533515               | 1.988365  | -1.613175 |
| 41            | 1             | 0           | 4.401152                | 2.928182  | -0.078997 |
| 42            | 1             | 0           | -4.711884               | 1.610146  | 1.960713  |
| 43            | 6             | 0           | -2.802296               | 2.312746  | 2.605274  |
| 44            | 7             | 0           | -1.582622               | 2.020523  | 2.243932  |
| 45            | 1             | 0           | -3.076132               | 3.025983  | 3.367986  |
| 46            | 7             | 0           | 0.378689                | -1.382194 | 2.918822  |
| 47            | 6             | 0           | 1.224914                | -2.317298 | 3.247693  |
| 48            | 1             | 0           | 1.440124                | -2.641234 | 4.254805  |
| 49            | 7             | 0           | 3.833742                | 0.252565  | 1.491135  |
| 50            | 6             | 0           | 4.641174                | 1.225102  | 1.161073  |
| 51            | 1             | 0           | 5.659563                | 1.350395  | 1.500326  |
| 52            | 1             | 0           | 2.547530                | -3.544164 | 2.109247  |

**Table S20.** Cartesian coordinates of **3** at the <sup>3</sup>TS optimized geometry.

| Center Number | Atomic Number | Atomic Type | Coordinates (Angstroms) |           |           |
|---------------|---------------|-------------|-------------------------|-----------|-----------|
|               |               |             | X                       | Y         | Z         |
| 1             | 77            | 0           | -0.324053               | 0.049620  | -0.019661 |
| 2             | 7             | 0           | 2.612923                | -0.496698 | -0.869808 |
| 3             | 6             | 0           | 2.823221                | -1.583456 | -0.076468 |
| 4             | 6             | 0           | 1.847428                | -2.058268 | 0.907261  |
| 5             | 6             | 0           | 2.235546                | -3.099970 | 1.765855  |
| 6             | 6             | 0           | 1.369852                | -3.630247 | 2.708816  |
| 7             | 6             | 0           | 0.079590                | -3.116009 | 2.802656  |
| 8             | 6             | 0           | -0.313575               | -2.082435 | 1.958168  |
| 9             | 6             | 0           | 0.548145                | -1.516500 | 1.001430  |
| 10            | 7             | 0           | -1.464975               | -1.323526 | -1.211304 |
| 11            | 6             | 0           | -2.820710               | -1.178897 | -1.091642 |
| 12            | 6             | 0           | -3.282811               | -0.134563 | -0.194273 |
| 13            | 6             | 0           | -4.632680               | 0.115253  | 0.058345  |
| 14            | 6             | 0           | -4.992211               | 1.133768  | 0.933290  |
| 15            | 6             | 0           | -3.999018               | 1.892611  | 1.553803  |
| 16            | 6             | 0           | -2.652602               | 1.638387  | 1.303433  |
| 17            | 6             | 0           | -2.250366               | 0.623964  | 0.421049  |
| 18            | 7             | 0           | 0.436129                | 1.282717  | -1.596531 |
| 19            | 6             | 0           | 1.143780                | 2.357620  | -1.124617 |
| 20            | 6             | 0           | 1.275241                | 2.477813  | 0.314690  |
| 21            | 6             | 0           | 1.968154                | 3.518680  | 0.937490  |
| 22            | 6             | 0           | 2.045129                | 3.566668  | 2.323078  |
| 23            | 6             | 0           | 1.427056                | 2.566357  | 3.075520  |
| 24            | 6             | 0           | 0.737344                | 1.529791  | 2.451492  |
| 25            | 6             | 0           | 0.634364                | 1.449189  | 1.054601  |
| 26            | 1             | 0           | 3.245898                | -3.497329 | 1.698302  |
| 27            | 1             | 0           | 1.697919                | -4.433395 | 3.362593  |
| 28            | 1             | 0           | -0.621379               | -3.515653 | 3.531411  |
| 29            | 1             | 0           | -1.326013               | -1.692682 | 2.051222  |
| 30            | 1             | 0           | -5.403295               | -0.482588 | -0.424317 |
| 31            | 1             | 0           | -6.041109               | 1.333856  | 1.132993  |
| 32            | 1             | 0           | -4.279706               | 2.689717  | 2.238106  |
| 33            | 1             | 0           | -1.894556               | 2.236735  | 1.800939  |
| 34            | 1             | 0           | 2.447440                | 4.291794  | 0.339880  |
| 35            | 1             | 0           | 2.582150                | 4.373248  | 2.813859  |
| 36            | 1             | 0           | 1.487051                | 2.595391  | 4.161084  |
| 37            | 1             | 0           | 0.272209                | 0.757601  | 3.059564  |
| 38            | 7             | 0           | 3.625932                | -0.303420 | -1.651849 |
| 39            | 7             | 0           | -1.156581               | -2.276690 | -2.032020 |
| 40            | 7             | 0           | 0.374176                | 1.272139  | -2.893188 |
| 41            | 6             | 0           | 4.066950                | -2.091383 | -0.406545 |
| 42            | 1             | 0           | 4.639458                | -2.935110 | -0.056475 |
| 43            | 7             | 0           | 4.511475                | -1.265048 | -1.376197 |
| 44            | 7             | 0           | -2.315873               | -2.762499 | -2.458491 |
| 45            | 7             | 0           | 1.046346                | 2.348741  | -3.279003 |
| 46            | 6             | 0           | -3.382576               | -2.129140 | -1.913439 |
| 47            | 1             | 0           | -4.401982               | -2.392626 | -2.144460 |
| 48            | 6             | 0           | 1.545888                | 3.058769  | -2.237835 |
| 49            | 1             | 0           | 2.122388                | 3.960019  | -2.368563 |
| 50            | 1             | 0           | 1.134679                | 2.535930  | -4.265008 |
| 51            | 1             | 0           | 5.383310                | -1.297147 | -1.880154 |
| 52            | 1             | 0           | -2.306121               | -3.526564 | -3.115292 |

**Table S21.** Cartesian coordinates of **4** at the <sup>3</sup>TS optimized geometry.

| Center<br>Number | Atomic<br>Number | Atomic<br>Type | Coordinates (Angstroms) |           |           |
|------------------|------------------|----------------|-------------------------|-----------|-----------|
|                  |                  |                | X                       | Y         | Z         |
| 1                | 77               | 0              | 0.248425                | 0.019583  | 0.078607  |
| 2                | 7                | 0              | -4.230888               | 1.292580  | -0.750422 |
| 3                | 6                | 0              | -2.532653               | 1.192519  | 0.957483  |
| 4                | 6                | 0              | -3.374616               | 1.869226  | 1.842752  |
| 5                | 6                | 0              | -2.887060               | 2.284781  | 3.072147  |
| 6                | 6                | 0              | -1.563860               | 2.013552  | 3.410353  |
| 7                | 6                | 0              | -0.746692               | 1.326928  | 2.516994  |
| 8                | 6                | 0              | -1.197375               | 0.896050  | 1.258804  |
| 9                | 7                | 0              | 0.638278                | 1.896426  | -0.884007 |
| 10               | 6                | 0              | 2.831407                | 1.400856  | -0.180844 |
| 11               | 6                | 0              | 4.171523                | 1.746766  | -0.073425 |
| 12               | 6                | 0              | 5.018864                | 0.863901  | 0.588433  |
| 13               | 6                | 0              | 4.515981                | -0.323104 | 1.122801  |
| 14               | 6                | 0              | 3.164970                | -0.639572 | 0.999125  |
| 15               | 6                | 0              | 2.273441                | 0.214017  | 0.332909  |
| 16               | 7                | 0              | 0.107929                | -1.282121 | -1.676209 |
| 17               | 6                | 0              | -0.080999               | -2.881397 | 0.049128  |
| 18               | 6                | 0              | -0.228753               | -4.205888 | 0.446832  |
| 19               | 6                | 0              | -0.274437               | -4.479667 | 1.806891  |
| 20               | 6                | 0              | -0.174050               | -3.432348 | 2.724082  |
| 21               | 6                | 0              | -0.028355               | -2.116922 | 2.291215  |
| 22               | 6                | 0              | 0.025668                | -1.787422 | 0.928864  |
| 23               | 1                | 0              | -4.400743               | 2.059829  | 1.548489  |
| 24               | 1                | 0              | -3.539126               | 2.811804  | 3.761946  |
| 25               | 1                | 0              | -1.165748               | 2.332171  | 4.369886  |
| 26               | 1                | 0              | 0.286020                | 1.130115  | 2.799977  |
| 27               | 1                | 0              | 4.530843                | 2.679624  | -0.495260 |
| 28               | 1                | 0              | 6.072477                | 1.106402  | 0.688902  |
| 29               | 1                | 0              | 5.185335                | -1.006686 | 1.638085  |
| 30               | 1                | 0              | 2.789015                | -1.566402 | 1.422493  |
| 31               | 1                | 0              | -0.300982               | -4.990041 | -0.299524 |
| 32               | 1                | 0              | -0.388936               | -5.503514 | 2.149125  |
| 33               | 1                | 0              | -0.213377               | -3.644748 | 3.789281  |
| 34               | 1                | 0              | 0.033739                | -1.321414 | 3.028228  |
| 35               | 7                | 0              | 1.917659                | 2.258843  | -0.835176 |
| 36               | 7                | 0              | 2.180105                | 3.411228  | -1.407681 |
| 37               | 6                | 0              | 0.995705                | 3.828905  | -1.859433 |
| 38               | 6                | 0              | 0.020494                | 2.883264  | -1.532492 |
| 39               | 1                | 0              | 0.900025                | 4.768534  | -2.382161 |
| 40               | 1                | 0              | -1.044043               | 2.858154  | -1.705689 |
| 41               | 6                | 0              | 0.093535                | -2.618178 | -3.414928 |
| 42               | 6                | 0              | 0.179763                | -1.287535 | -3.010969 |
| 43               | 7                | 0              | -0.023947               | -3.398135 | -2.334447 |
| 44               | 7                | 0              | -0.011308               | -2.557852 | -1.325759 |
| 45               | 1                | 0              | 0.114596                | -3.044841 | -4.406513 |
| 46               | 1                | 0              | 0.284576                | -0.370723 | -3.569331 |
| 47               | 7                | 0              | -3.085906               | 0.806309  | -0.296377 |
| 48               | 7                | 0              | -2.491284               | -0.068322 | -1.086637 |
| 49               | 6                | 0              | -3.301913               | -0.163869 | -2.138239 |
| 50               | 6                | 0              | -4.392088               | 0.685213  | -1.924104 |
| 51               | 1                | 0              | -3.070155               | -0.823640 | -2.961313 |
| 52               | 1                | 0              | -5.257721               | 0.884333  | -2.538664 |
